# Supplementary material
Source: Research Square preprint supplement (doi:10.21203/rs.3.rs-8921882/v1)
Supplement: Supplementary file 1 [file d0f4718b71cc55d6790b30b8.xlsx]

## Sheet: data2
ID	分组	@1.你所在的医院？	性别	年龄	工龄AB	职称AB	用工方式	学历AB	@8.毕业院校	@9.您所在的科室是	@10.您可以开展的中医护理技术数量为单项选择	@11.艾灸	@11穴位注射	@11刮痧	@11拔罐	@11中药灌肠	@11经穴推拿	@11穴位贴敷	@11耳穴贴压	@11蜡疗	@11中药泡洗	@11中药熏蒸	@11中药烫熨	@11中药封包	@11中药湿敷	@11中药涂药	@11中药离子导入	@11中药涂擦	@11其他	剖面分析	A1_1	A1_2	A1_3	A1_4	A1_5	A1_6	A1_7	A1_8	A1_9	A1_10	A1_11	A1_12	B1_1	B1_2	B1_3	B1_4	B1_5	B1_6	B1_7
1	2	3	2	3	3	2	1	3	川北医学院	心内科	1	0	0	0	0	0	0	0	0	0	0	0	0	0	0	0	0	0	1	1	2	2	2	2	2	2	2	2	2	3	2	2	2	2	2	2	2	2	2
2	2	3	2	3	3	2	2	3	西南医科大学	肾病内科	2	0	0	1	1	0	0	0	0	0	1	0	0	0	1	1	0	0	0	1	2	1	3	2	2	2	2	2	2	3	3	1	2	1	3	3	3	3	2
3	2	2	2	3	3	1	1	2	成都医学院	产科	1	0	0	0	0	0	0	0	1	0	0	0	0	1	0	0	0	0	0	1	2	1	1	1	1	1	1	1	2	2	3	1	2	2	2	2	2	2	2
4	2	2	2	2	1	1	2	3	成都医学院	产科	1	0	0	0	0	0	0	0	1	0	0	0	0	1	0	0	0	0	0	1	2	2	2	2	2	2	2	2	2	2	2	2	2	2	2	2	2	2	2
5	2	20	2	3	3	2	2	3	成都医学院	门诊部	1	0	0	0	0	1	0	0	0	0	1	0	0	0	0	0	0	0	0	1	3	3	3	1	4	2	1	2	2	5	2	1	2	2	2	2	4	2	2
6	2	3	2	2	1	1	2	2	成都医学院	肝胆甲乳外科	1	0	0	0	0	0	0	0	0	0	0	0	0	0	0	1	0	1	0	1	2	4	3	2	4	1	2	2	2	4	5	2	1	1	1	1	2	1	1
7	2	3	2	2	2	1	2	1	广东医科大学	心内一	1	0	0	1	0	0	0	0	1	0	0	0	0	0	0	0	0	0	0	1	4	4	5	1	2	4	2	1	3	4	3	5	4	4	1	1	1	1	1
8	2	20	2	3	3	2	1	2	重庆广播电视大学	儿保科	1	0	0	0	0	0	0	0	0	0	1	0	0	0	0	0	0	0	0	1	3	1	3	3	5	4	5	3	4	2	1	1	2	2	1	1	1	1	1
9	2	3	2	2	1	1	2	2	西南财经大学天府学院	心血管内科二病区	1	0	0	0	1	1	0	0	0	0	0	1	0	0	1	1	0	0	0	1	3	4	3	1	5	2	2	1	1	4	3	1	5	1	3	3	4	1	1
10	2	3	2	4	1	2	1	2	四川大学	重症医学科	1	0	0	0	0	0	0	0	0	0	0	0	0	0	0	0	0	0	1	1	1	1	1	1	1	1	1	1	1	1	1	1	1	1	1	1	1	1	1
11	2	20	2	2	2	1	2	2	成都医学院	运营发展部	1	0	0	0	0	0	0	0	0	0	0	0	0	0	0	0	0	0	1	1	1	1	1	1	1	1	1	1	1	1	1	1	3	2	1	2	2	1	2
12	2	20	2	3	3	2	2	2	成都铁路卫生学院	门诊儿保科	1	0	0	0	0	0	0	0	0	0	1	0	0	0	0	0	0	0	0	1	3	2	3	3	3	3	3	2	2	2	2	2	2	2	2	2	2	2	2
13	2	2	2	2	2	1	2	2	重庆市三峡医药高等专科学校	肾病内科	1	0	0	1	0	0	0	0	0	0	0	0	0	0	0	0	0	1	0	1	1	1	1	1	3	1	1	1	1	1	3	3	4	4	4	4	3	4	3
14	2	6	2	4	5	1	1	1	川北医学院	血液净化室	1	0	0	0	0	1	0	0	0	0	0	0	0	0	0	0	0	0	0	1	1	1	1	1	1	1	1	1	1	2	2	1	3	3	3	1	4	2	1
15	2	3	2	3	2	2	1	2	川北医学院	胃肠外科	2	0	0	1	0	1	0	0	0	0	1	1	0	0	1	0	0	0	0	1	1	1	1	1	3	3	1	1	1	3	3	1	2	1	3	5	2	3	5
16	2	20	2	3	3	2	2	2	泸州医学院	妇科	1	0	0	0	0	1	0	0	0	0	1	0	0	0	1	0	0	0	0	1	1	1	1	1	1	5	1	1	1	2	2	1	3	2	3	2	1	1	3
17	2	3	2	4	2	2	1	2	成都医学院	儿科	1	0	0	0	0	0	0	1	1	0	0	0	0	0	0	0	0	1	0	1	2	2	2	2	2	2	2	2	2	2	2	2	3	3	5	2	4	2	2
18	2	6	2	4	5	1	1	2	川北医学院	新生儿室	1	0	0	0	0	0	0	0	0	0	0	0	0	0	0	1	0	1	0	1	2	2	2	2	2	2	2	2	2	2	2	2	1	4	3	1	2	2	5
19	2	3	2	3	3	2	2	1	达州医学院	神经内科	1	0	0	0	0	0	0	0	0	1	0	1	0	0	0	0	0	0	0	1	1	1	1	1	1	1	1	1	1	1	1	1	3	4	3	1	5	2	2
20	2	3	2	3	2	2	2	2	四川广播电视大学	儿科	1	0	0	0	0	0	0	0	0	0	0	0	0	0	0	0	0	0	1	1	3	2	2	2	2	2	2	2	2	2	2	2	2	2	3	3	2	2	2
21	2	20	2	2	2	1	2	3	成都医学院	内科	1	1	0	0	0	1	0	1	1	0	0	1	0	0	0	0	0	0	0	1	2	2	2	2	2	2	2	2	2	2	2	2	4	2	2	2	4	2	4
22	2	6	2	2	1	1	2	3	川北医学院	心内科	1	1	0	1	0	0	0	0	0	0	0	0	0	0	0	0	0	0	0	1	1	1	2	2	2	3	1	1	1	1	2	1	3	2	3	3	2	2	3
23	2	3	2	3	3	2	2	3	川北医学院	五官科	1	1	0	0	0	0	0	1	0	0	0	0	0	0	0	0	0	0	0	1	2	2	2	2	2	2	2	2	2	2	3	2	3	2	2	2	2	2	3
24	2	20	2	4	3	2	2	1	中国医科大	产科门诊	1	0	0	0	0	0	0	0	0	0	0	0	0	0	0	0	0	0	1	1	1	1	1	1	1	1	1	1	1	1	1	1	1	1	1	1	1	1	1
25	2	3	2	4	2	2	2	2	川北医学院	五官科	1	0	0	0	0	0	0	0	0	0	0	1	0	0	0	0	0	0	0	1	2	2	2	2	2	2	2	2	2	2	2	2	2	2	2	2	2	2	2
26	2	6	2	3	3	1	2	1	南充卫校	急诊科	1	0	0	0	0	0	0	0	0	0	0	0	0	0	0	1	0	1	0	1	1	1	1	1	1	1	1	1	1	1	1	1	1	1	1	1	1	1	1
27	2	6	2	3	1	2	2	2	成都医学院	急诊科	1	1	0	1	1	1	0	1	1	0	0	0	0	0	0	0	0	0	0	1	2	2	2	2	2	2	2	2	2	2	2	2	2	2	2	2	2	2	2
28	2	3	2	3	1	2	2	2	中国医科大学	心内一病区	2	0	0	0	0	0	0	0	0	0	1	0	0	1	0	1	0	1	0	1	4	2	3	3	3	4	4	2	1	2	2	1	5	3	3	3	2	2	2
29	2	3	2	4	1	1	1	2	川北医学院	麻醉手术中心	1	0	0	0	0	0	0	0	0	0	1	0	0	0	0	0	0	0	1	1	1	1	1	1	1	3	1	1	1	1	2	1	3	1	2	3	1	1	1
30	2	3	2	4	2	1	1	2	泸州医学院	麻醉手术中心	1	1	0	0	1	0	0	0	0	0	0	0	0	0	0	0	0	0	0	1	1	1	1	1	1	5	1	1	1	1	1	1	4	1	4	4	4	1	1
31	2	3	2	4	2	1	1	2	成都医学院	神经内科	1	0	0	0	0	1	0	0	0	0	0	0	0	0	0	1	0	1	0	1	1	1	1	1	1	1	1	1	1	1	1	1	2	1	2	2	3	2	2
32	2	3	2	4	1	1	1	2	广元职工医学院	儿科	1	0	0	0	0	0	0	0	0	0	0	0	0	0	0	0	0	0	1	1	1	1	1	1	1	1	1	1	1	1	1	1	1	1	1	1	1	1	1
33	2	8	2	3	2	1	1	2	中央广播电视大学	眼耳鼻喉科	1	0	0	0	0	0	0	0	0	0	0	1	0	0	1	0	0	0	0	1	1	1	1	3	1	1	1	1	1	3	3	1	4	1	3	3	4	3	3
34	2	8	2	3	3	2	1	2	成都医学院	肾内科	2	0	0	0	0	1	0	1	0	0	0	0	1	1	0	0	0	0	0	1	2	1	1	1	1	1	2	1	2	1	2	1	3	3	3	3	3	1	3
35	2	20	2	2	2	1	2	2	职工医学院	急诊	1	0	0	0	0	0	0	0	0	0	0	0	0	0	0	0	0	0	1	1	3	2	1	2	2	3	2	1	1	2	1	1	2	2	2	4	3	1	1
36	2	2	2	4	1	2	1	2	成都医学院	神经外科	2	0	0	0	0	0	0	1	1	0	0	0	0	0	1	0	0	0	0	1	3	1	2	3	2	2	2	2	2	2	4	2	1	4	2	4	4	3	1
37	2	20	2	3	3	1	2	2	川北医学院	公卫科	1	1	0	0	0	0	0	1	0	0	0	0	0	0	0	0	0	0	0	1	1	1	1	1	2	1	1	1	1	2	1	2	3	2	1	2	3	4	4
38	2	3	2	3	3	2	2	2	雅安职业技术学院	儿科	1	0	0	0	0	0	0	0	0	0	0	0	0	0	0	0	0	0	1	1	2	1	1	1	3	3	2	1	1	1	1	1	2	4	1	2	1	5	5
39	2	8	2	3	1	1	2	2	川北医学院	手术室	1	0	0	0	0	0	0	0	0	0	0	1	1	0	0	0	0	0	0	1	1	1	1	1	1	1	2	1	1	2	1	1	5	3	3	2	5	4	3
40	2	3	2	3	3	2	2	1	成都中医药大学	肾病内科	1	0	0	0	0	0	0	0	0	0	0	0	0	0	0	1	0	1	0	1	1	1	1	1	1	1	1	1	1	1	1	1	1	1	1	1	1	1	1
41	2	20	2	2	1	1	2	2	四川省卫生学校	儿科	1	0	1	0	0	0	0	0	0	0	0	0	0	0	0	0	0	0	0	1	1	1	1	1	1	1	1	1	1	1	1	1	1	1	1	1	1	1	1
42	2	6	2	2	1	1	2	2	达州职业技术学院	妇产科	1	0	0	0	0	0	0	0	1	0	0	0	0	0	0	0	0	0	0	1	2	2	2	2	2	4	2	2	2	2	2	2	2	2	2	2	2	2	2
43	2	6	2	1	5	2	1	2	苍溪县广播电视大学	耳鼻咽喉	1	0	0	0	0	0	0	0	0	0	0	0	0	0	0	0	0	0	1	1	1	1	1	1	1	1	1	1	1	1	1	1	3	2	1	2	3	4	4
44	2	8	2	4	5	1	1	3	四川大学	急诊科	1	0	0	0	0	0	0	0	0	0	0	0	0	0	0	1	0	1	0	1	1	1	2	1	1	2	1	1	1	1	1	1	2	1	3	5	2	3	5
45	2	6	2	2	2	1	2	3	成都医学院	肝胆外科	1	0	0	0	0	0	0	0	0	0	0	1	0	0	0	0	0	0	0	1	2	2	2	2	2	3	3	2	2	2	2	2	2	4	3	2	4	1	2
46	2	2	2	2	1	1	2	3	西南医科大学	呼吸与危重症医学科	1	0	0	0	0	0	0	1	1	0	0	0	0	0	0	0	0	0	0	1	2	2	2	2	2	2	2	2	2	3	3	2	3	1	2	2	1	2	4
47	2	3	2	3	3	1	2	3	成都医学院	风湿免疫罕见病科	1	0	0	0	0	0	0	0	0	0	0	0	0	0	1	1	0	0	0	1	1	1	1	1	1	3	1	1	1	1	1	1	1	1	1	1	1	1	1
48	2	6	2	2	2	1	2	3	川北医学院	内镜中心	1	0	0	0	0	1	0	0	0	0	0	0	0	0	0	0	0	0	0	1	3	1	2	2	2	3	2	2	2	2	3	2	3	2	2	2	3	2	2
49	2	3	1	2	1	1	2	3	成都中医院大学	重症医学科	1	0	0	0	0	0	1	0	0	0	0	0	0	0	1	0	0	0	0	1	3	2	2	2	2	4	2	2	2	2	2	2	2	2	2	2	2	2	2
50	2	3	2	3	3	1	2	3	川北医学院	呼吸与危重症医学科	1	0	0	0	0	0	0	0	0	0	0	0	0	0	0	0	0	0	1	1	1	1	1	1	1	1	1	1	1	1	1	1	4	4	2	4	4	4	4
51	2	3	2	3	2	1	2	3	西南医科大学	呼吸与危重症医学科	1	1	0	0	0	1	0	0	0	0	0	0	0	0	0	0	0	0	0	1	2	2	2	2	2	2	2	2	2	2	2	2	1	1	1	1	1	1	1
52	2	8	2	2	1	1	2	3	西南医科大学	肾内科	1	1	0	0	1	1	0	1	0	0	0	1	0	0	0	0	0	0	0	1	2	1	1	1	1	3	1	1	1	1	1	1	3	2	2	4	4	2	4
53	2	2	2	2	2	1	2	3	成都医学院	产科	1	0	0	0	0	0	0	0	1	0	0	0	0	1	0	0	0	0	0	1	5	3	1	1	1	1	1	1	1	1	1	1	5	1	1	1	1	1	1
54	2	3	2	3	2	1	2	2	川北医学院	呼吸与危重症医学科	1	0	0	0	0	1	0	0	0	0	0	0	0	0	0	0	0	0	0	1	1	1	4	1	1	1	1	1	1	1	1	1	1	1	1	1	1	1	1
55	2	2	2	3	3	2	2	2	成都中医药大学	泌尿外科	1	0	0	0	0	0	0	0	1	0	0	1	0	0	0	0	0	0	0	1	2	2	2	2	2	2	2	2	2	2	3	1	3	1	1	1	1	1	1
56	2	14	2	3	1	1	2	3	成都中医院大学	骨科	2	1	0	0	0	0	0	1	1	0	1	1	0	1	1	0	0	0	0	1	2	2	2	2	2	2	3	2	1	3	3	2	5	2	1	4	2	4	4
57	2	6	2	4	5	3	1	3	国家开放大学	妇产科	1	0	0	0	0	0	0	1	1	0	0	0	0	0	0	0	0	0	0	2	3	2	2	2	2	2	2	2	2	3	2	2	3	5	3	3	4	2	2
58	2	14	1	2	1	1	2	2	川北医学院	急诊科	1	1	1	0	0	0	0	1	1	1	0	0	0	0	0	0	0	0	0	2	2	2	2	2	2	3	2	2	2	3	3	2	4	3	3	3	3	3	4
59	2	6	2	3	3	2	2	3	中国医科大	妇产科	1	0	0	0	0	0	0	1	0	0	0	0	0	0	0	0	0	0	0	2	3	3	3	3	3	3	3	3	3	3	3	3	2	2	2	2	4	2	3
60	2	14	2	3	1	1	2	3	成都医学院	急诊科	1	1	0	0	0	0	0	1	0	0	0	0	0	0	0	0	0	0	0	2	2	2	2	2	3	3	2	2	2	3	4	2	4	3	3	2	2	2	3
61	2	2	2	3	4	1	1	3	成都医学院	胸外科	2	0	1	0	0	0	0	1	1	0	0	0	0	0	1	0	0	0	0	2	3	3	3	3	3	3	3	3	3	3	4	3	3	3	3	3	3	3	4
62	2	2	2	1	5	3	1	2	四川广播电视大学	核医学科	1	1	1	1	1	1	1	1	1	0	1	1	0	0	1	1	0	0	0	2	2	2	2	3	2	2	2	2	3	3	3	2	4	3	4	4	2	4	4
63	2	2	2	2	1	1	2	3	重庆医科大学	妇科	2	0	0	0	0	0	0	1	1	0	0	0	0	1	0	0	0	0	0	2	4	4	4	3	2	4	4	2	2	3	4	2	2	1	1	3	3	1	4
64	2	4	2	2	2	1	2	3	广元职工医学院	妇产科	2	0	0	0	0	1	0	0	0	0	0	1	0	0	0	0	0	1	0	2	4	2	2	3	3	5	3	3	4	4	3	3	3	3	3	3	4	3	3
65	2	20	2	3	3	2	2	3	成都铁路卫校	儿科	1	0	0	1	1	0	0	1	1	0	0	0	0	0	1	1	0	1	0	2	2	2	2	4	3	1	1	3	4	3	1	3	5	5	4	4	4	4	4
66	2	20	2	4	5	2	1	2	川北医学院	中医科	2	1	1	1	1	1	1	0	0	0	0	0	0	1	1	1	1	1	0	2	5	1	3	3	5	3	4	1	2	4	5	1	2	5	4	4	4	4	2
67	2	2	2	2	1	1	2	3	川北医学院	产科	1	0	0	0	0	0	0	0	0	0	0	0	0	1	0	0	0	0	0	2	1	4	3	3	4	4	1	4	4	1	4	1	1	2	2	2	2	2	2
68	2	20	2	2	3	1	2	2	广元职工医学院	儿科	2	0	1	0	0	0	1	1	0	0	1	0	0	0	1	0	0	0	1	2	5	1	2	5	4	3	1	3	3	5	5	5	5	1	3	3	3	3	3
69	2	2	2	3	4	2	1	3	川北医学院	影像科	1	0	0	0	0	0	0	0	0	0	1	0	0	0	0	0	0	1	0	2	1	5	4	3	3	5	2	1	2	3	3	3	5	4	3	3	3	2	2
70	2	3	2	2	1	1	2	3	成都中医药大学	肝胆甲乳外科	1	0	0	0	1	0	0	0	1	0	0	1	0	0	0	0	0	0	0	2	1	2	3	5	5	4	2	1	3	2	5	3	1	3	3	4	3	3	3
71	2	20	2	2	1	1	2	3	四川应用技术职业学院	妇产科	1	0	0	0	0	0	0	1	1	0	0	0	0	0	0	0	0	0	0	2	3	2	3	2	1	1	3	3	2	2	5	2	5	2	3	3	3	3	4
72	2	3	2	2	1	1	2	3	西南医科大学	重症医学科	1	0	0	0	0	0	0	0	0	0	1	1	1	0	1	0	0	0	0	2	4	4	2	4	4	4	4	1	3	4	3	3	5	5	2	2	2	2	2
73	2	3	2	2	1	1	2	3	北京中医药大学东方学院	急诊科	1	0	0	0	0	0	0	0	0	0	0	0	0	1	1	1	0	1	0	2	3	3	5	2	4	2	2	2	4	3	4	2	1	3	3	3	3	3	3
74	2	3	2	1	5	3	1	3	四川电大	五官科	1	1	0	1	1	0	0	0	0	0	0	0	0	0	0	0	0	1	0	2	1	4	3	1	2	2	5	2	4	3	4	2	1	2	3	3	3	3	3
75	2	3	2	2	1	1	2	3	山东协和学院	普外一	1	0	0	0	0	1	0	0	1	0	1	0	0	0	1	1	0	1	0	2	4	3	3	1	2	4	4	1	4	5	2	2	2	3	3	3	4	4	4
76	2	3	2	3	3	2	1	3	成都医学院	儿科	1	0	0	0	0	0	0	1	0	0	0	0	0	0	0	0	0	0	0	2	2	4	1	2	1	5	5	4	2	1	4	1	4	1	2	2	2	3	3
77	2	12	2	2	2	1	2	3	川北医学院	精神科	1	1	0	0	0	1	0	0	0	0	1	0	0	0	1	1	0	1	0	2	2	2	5	2	2	3	4	2	1	1	3	3	1	5	4	4	4	2	2
78	2	3	2	4	5	3	1	2	四川大学	妇科	1	0	0	0	0	0	0	0	0	0	0	0	0	0	0	0	0	0	1	2	4	2	2	1	3	5	2	3	4	1	3	1	5	1	3	3	3	3	3
79	2	3	2	3	4	2	2	3	西南医科大学	儿科	1	1	0	1	1	0	0	1	0	0	0	0	0	0	1	0	0	0	1	2	5	3	3	2	5	4	3	2	1	1	1	4	1	5	4	5	2	2	5
80	2	2	2	2	1	1	2	3	川北医学院	产科	1	0	0	0	0	0	0	1	1	0	0	0	0	0	0	0	0	0	0	2	4	4	4	4	4	4	4	3	4	4	4	3	3	2	3	3	3	3	4
81	2	6	2	2	1	1	2	2	成都中医药大学	血液透析室	3	1	0	1	1	0	0	1	0	0	0	0	0	0	0	0	0	1	0	2	4	3	3	3	3	3	3	3	3	3	3	3	3	3	3	3	3	3	3
82	1	11	2	3	3	2	2	3	成都医学院	外科	3	0	0	0	0	0	0	0	0	0	1	0	1	0	1	1	0	1	0	2	3	3	3	3	3	3	3	3	3	3	3	3	3	3	3	3	3	3	3
83	2	6	2	3	3	1	2	3	川北医学院	神内	1	0	0	0	0	1	0	1	1	0	0	0	0	0	0	0	0	0	0	2	1	1	1	2	2	3	2	3	2	3	3	1	4	4	4	4	5	3	3
84	2	6	2	3	2	1	2	3	成都医学院	新生儿科	1	0	0	0	0	0	0	0	0	0	1	1	0	0	0	0	0	0	1	2	2	2	2	2	2	2	2	2	2	2	2	2	2	2	2	2	2	2	2
85	2	3	2	3	3	1	2	3	西南医科大学	麻醉手术中心	1	0	0	0	0	0	0	0	0	0	1	0	0	0	1	1	0	0	0	2	4	4	4	4	4	4	4	4	4	4	4	4	2	2	2	4	3	1	1
86	2	3	2	2	1	1	2	3	湖北医院学院	神经内科	1	0	0	0	1	0	0	0	0	0	1	1	0	0	1	0	0	1	0	2	3	3	3	3	3	4	3	3	3	3	3	3	1	4	2	4	4	3	1
87	2	3	2	2	1	1	2	3	川北医学院	Icu	1	1	0	0	0	0	0	0	0	0	0	1	0	0	0	0	0	0	0	2	3	3	3	2	2	4	2	3	3	2	2	2	3	2	1	2	3	4	4
88	2	6	2	2	1	1	2	3	南方医大	血透室	1	1	0	0	0	0	0	0	0	0	0	0	0	0	0	0	0	0	0	2	3	3	3	3	3	3	3	3	3	3	3	3	5	1	2	5	4	3	1
89	2	6	2	3	3	1	2	3	川北医学院	肾病科	1	1	1	1	1	1	1	1	1	0	1	1	1	1	1	1	1	1	0	2	3	2	2	3	3	3	3	2	3	2	3	3	1	5	4	3	3	5	2
90	2	6	1	2	1	1	2	3	北京中医药大学	血液透析室	1	0	0	0	0	0	0	1	1	0	0	0	0	0	0	0	0	1	0	2	3	3	3	3	3	3	3	3	3	3	3	3	1	2	3	5	5	4	2
91	2	3	2	3	3	2	2	3	成都医学院	肾内科	1	0	0	1	0	0	0	0	0	0	0	0	0	0	1	1	0	0	0	2	3	3	3	3	3	5	3	3	3	3	3	3	2	4	3	2	4	1	2
92	2	20	2	3	2	1	2	3	四川护理职业学院	检验科	2	1	0	0	0	0	0	0	0	0	0	0	0	0	0	0	0	0	0	2	3	3	3	2	2	3	2	2	2	2	2	2	4	4	2	4	4	4	4
93	2	20	2	2	2	1	2	2	职工医学院	供应室	1	0	0	0	0	1	0	0	1	0	0	0	0	0	1	1	0	0	0	2	4	3	4	2	3	3	3	3	2	3	3	3	4	4	5	1	2	4	2
94	2	2	1	2	1	1	2	3	西安医学院	康复医学科	1	0	0	0	0	0	0	1	1	0	0	0	0	0	0	0	0	0	0	2	5	4	5	4	3	3	3	3	4	4	4	4	4	3	3	1	2	4	4
95	2	6	2	2	2	1	2	3	川北医学院	血液净化室	1	0	0	0	0	0	0	1	1	0	0	0	0	0	0	0	0	0	0	2	2	3	2	3	3	3	3	2	2	2	2	2	3	1	3	3	5	4	5
96	2	6	2	4	3	2	2	3	中南大学	儿科	1	0	0	0	0	0	0	0	0	0	0	0	0	0	0	0	0	0	1	2	2	2	2	3	3	3	2	2	2	3	2	2	2	4	1	2	1	5	5
97	2	20	2	2	2	1	2	3	成都医学院	老年科	3	1	1	1	1	1	1	1	1	0	1	1	1	1	1	1	1	1	0	2	3	3	3	3	3	3	3	3	3	3	3	3	2	2	5	2	2	3	4
98	2	6	2	2	2	1	2	3	川北医学院	血液净化室	1	0	0	0	0	0	0	1	1	0	0	0	0	0	0	0	0	0	0	2	3	3	2	3	3	3	2	3	3	3	2	3	4	2	2	1	3	5	2
99	2	14	2	2	2	2	1	3	川北医学院	内一科	2	1	0	0	0	1	0	1	1	0	0	1	0	1	1	0	0	0	0	2	3	2	2	3	2	3	3	2	2	4	4	2	5	3	3	2	5	4	3
100	2	3	2	2	1	1	2	3	西南医科大学	手术室	2	0	0	0	0	1	0	0	0	0	1	0	0	0	0	1	0	1	0	2	4	1	3	1	3	3	3	2	1	3	2	1	2	1	2	2	4	2	3
101	2	3	2	3	3	2	2	3	川北医学院	手术室	1	1	1	0	1	0	0	0	1	0	1	1	1	1	1	1	0	0	0	2	3	1	1	3	2	2	3	3	3	3	3	2	4	4	4	4	2	2	3
102	2	3	2	3	2	1	2	3	成都医学院	儿科	1	0	0	0	0	0	1	1	0	0	0	0	0	0	0	0	0	0	0	2	4	1	3	1	1	4	4	1	3	2	3	1	3	3	3	3	3	3	3
103	2	6	2	4	5	3	1	3	中国医科大学	急诊医学科	2	1	0	1	1	1	0	1	1	0	0	0	0	0	1	0	0	1	0	2	3	3	3	3	2	3	2	2	2	3	3	2	3	3	3	3	3	3	3
104	2	4	2	3	3	1	2	2	泸州医学院	内五科	3	1	1	0	1	0	0	0	0	1	0	1	0	0	0	0	0	0	0	2	4	4	4	3	3	3	3	3	3	3	3	3	4	4	3	4	2	3	3
105	2	3	2	3	3	1	2	3	中国医科大学	神经内科	1	1	1	1	1	0	0	1	1	0	0	0	0	0	0	0	0	0	0	2	3	3	3	3	3	5	3	3	3	3	3	3	3	3	3	3	3	3	3
106	2	6	1	3	2	1	2	3	中国医科大学	肾病科	1	0	0	0	0	1	0	0	1	0	0	0	0	0	0	0	0	0	0	2	3	3	3	3	3	3	3	3	3	3	3	3	3	3	3	3	3	3	3
107	2	20	2	2	1	1	2	2	四川三河职业学院	儿保科	1	0	0	0	0	0	0	0	1	0	0	0	0	0	0	0	0	0	1	2	3	3	3	3	3	3	3	3	3	3	3	3	3	3	3	3	3	3	3
108	2	3	1	2	1	1	2	3	西南医科大学	手术室	1	0	0	0	0	0	0	0	0	0	0	0	0	0	0	0	0	0	1	2	3	3	3	3	3	3	3	3	3	3	3	3	3	3	3	3	3	3	3
109	2	2	2	3	3	1	1	3	四川中医院高等专科学校	妇科	3	0	0	0	0	1	0	1	1	0	0	0	0	1	1	1	0	1	0	2	2	2	2	2	2	3	2	2	2	3	4	3	4	3	2	2	5	2	5
110	2	14	2	2	2	1	2	3	成都医学院	内科	2	1	0	0	0	0	0	1	0	0	0	0	0	1	0	0	0	0	0	2	5	3	3	3	3	5	5	3	3	3	3	3	5	2	2	2	4	2	5
111	2	2	2	2	2	1	2	3	达州职业技术学院	心脏血管外科	1	1	0	0	0	1	0	1	1	1	0	1	0	1	1	1	1	1	0	2	2	2	2	2	2	2	2	2	3	3	3	2	4	2	3	4	4	2	4
112	2	3	2	3	3	1	2	3	泸州医学院	五官科	2	1	0	1	0	0	0	1	0	1	1	1	0	0	1	1	0	1	0	2	3	3	2	2	3	3	3	3	2	3	3	2	3	2	3	2	3	2	3
113	2	6	2	2	2	2	2	3	四川大学华西卫校	肾病科	1	0	0	0	0	0	0	0	0	0	1	0	0	0	0	0	0	0	0	2	3	3	3	3	3	3	3	3	3	3	3	3	3	3	3	3	3	3	3
114	2	3	2	2	1	1	2	3	成都中医药大学	麻醉手术中心	1	0	0	0	0	0	0	0	1	0	0	0	0	0	0	0	0	0	0	2	3	2	2	3	3	3	3	3	2	3	3	2	3	3	3	3	3	3	3
115	2	4	2	2	2	1	2	3	成都医学院	内二科	2	1	0	0	0	0	0	1	1	0	0	1	0	0	0	0	0	0	0	2	5	5	5	4	4	4	4	4	4	4	4	4	3	4	3	4	3	3	4
116	2	3	2	3	2	1	2	2	达州职业技术学院	心内一病区	2	1	0	0	0	0	1	0	0	0	1	1	0	1	1	1	1	1	0	2	3	3	3	3	3	3	3	3	3	3	3	3	3	3	3	3	3	3	3
117	2	3	2	3	2	2	2	3	重庆医科大学	神经内科	1	0	0	0	0	0	0	0	0	0	0	0	0	0	0	0	0	0	1	2	2	2	2	2	2	5	2	2	2	3	2	1	2	2	2	2	4	2	2
118	2	3	2	4	4	2	2	2	中央广播电视大学	儿科	1	1	0	1	0	1	0	0	0	0	0	0	0	0	0	0	0	0	0	2	3	3	4	4	3	3	3	4	3	3	2	2	4	3	2	2	3	3	3
119	2	6	1	3	1	1	2	3	川北医学院	急诊科	1	1	0	0	0	0	0	0	1	0	0	0	0	0	0	0	0	0	0	2	4	3	4	4	4	4	4	3	3	3	3	3	4	3	3	4	4	3	3
120	2	2	2	2	1	1	2	2	上海健康医学院	产科	3	0	0	0	0	0	0	1	1	0	0	0	0	1	1	1	0	1	0	2	3	3	3	3	3	5	4	3	3	5	5	4	3	3	3	3	3	3	4
121	2	20	2	2	2	2	2	3	西南医科大	妇科	2	0	0	1	1	0	1	0	0	0	0	0	0	0	0	0	0	0	0	2	3	2	2	3	3	3	2	2	3	3	4	3	3	2	3	3	2	3	2
122	2	6	2	3	3	1	2	2	川北医学院	骨二科	1	0	0	0	0	0	0	0	1	0	1	0	0	0	1	0	0	0	0	2	4	3	4	3	3	5	3	3	3	3	3	3	3	3	3	3	3	3	3
123	2	8	2	4	5	3	1	3	中央广播电视大学	急诊科	1	0	0	0	1	1	0	1	1	0	1	1	1	0	0	0	0	0	1	2	3	3	3	3	3	3	3	1	1	3	3	2	3	3	3	3	3	2	4
124	2	6	2	4	5	2	1	2	川北医学院	急诊科	1	0	0	0	0	0	0	0	0	0	0	0	0	0	0	0	0	0	1	2	3	3	3	3	3	4	4	4	4	3	3	4	4	4	3	4	4	4	4
125	2	6	2	4	5	2	1	2	成都医学院	急诊	1	0	0	0	0	0	0	0	0	0	0	0	0	0	0	0	0	0	1	2	4	3	3	3	3	3	3	3	4	3	3	3	4	3	3	3	3	3	3
126	2	8	2	4	5	2	1	3	四川开放大学	肿瘤科	1	0	0	0	0	0	0	1	0	0	0	0	1	0	0	0	0	0	0	2	3	3	3	3	3	3	3	3	3	3	3	3	3	3	3	3	3	3	3
127	2	8	2	1	5	3	1	3	中央广播电视大学	儿科	3	0	0	0	0	1	0	1	1	0	0	0	1	0	1	1	0	1	0	2	3	2	2	2	3	2	2	2	2	4	3	2	2	2	2	2	3	2	5
128	2	8	2	3	3	2	2	3	川北医学院	慢病管理中心	2	0	0	0	1	0	0	0	0	0	0	1	1	1	0	0	0	0	0	2	2	2	2	2	2	4	2	2	2	3	3	1	3	1	3	4	1	3	3
129	2	8	2	4	5	3	1	3	成都医学院	肿瘤	2	1	1	0	0	1	0	1	1	0	0	1	1	0	0	1	0	1	0	2	3	3	3	3	3	3	3	3	3	3	3	3	3	3	3	3	3	3	3
130	2	8	2	2	1	1	2	2	四川省针灸学校	消化	1	0	0	1	1	0	1	1	0	0	0	0	0	0	0	0	0	0	0	2	3	3	3	3	3	3	3	3	3	3	3	3	3	3	3	4	3	3	3
131	2	6	2	2	1	1	2	2	江西卫生职业学院	消化内科	1	1	0	0	0	0	0	0	0	0	0	0	0	0	1	1	0	0	0	2	3	3	3	3	3	4	3	3	3	3	3	3	3	3	3	1	4	2	1
132	2	8	2	3	2	1	2	3	安顺职业技术学院	泌尿神外	1	0	0	0	0	0	0	1	0	0	0	1	1	0	0	0	0	1	0	2	2	2	3	3	3	2	2	2	2	3	3	2	5	1	3	3	5	3	4
133	2	6	2	4	5	2	1	3	西安交通大学	妇产科	1	0	0	0	0	1	0	0	0	0	0	0	0	0	0	0	0	1	0	2	3	3	2	3	3	2	2	3	2	3	3	3	2	1	3	5	2	3	5
134	2	3	2	4	5	3	1	3	泸洲医学院	神经内科	1	0	0	0	0	0	0	0	0	1	0	0	0	0	0	0	0	0	0	2	4	4	4	4	4	4	4	4	4	4	4	4	1	4	3	3	4	4	1
135	2	2	2	3	1	2	2	3	川北医学院	呼吸内科	1	0	0	0	0	0	0	0	1	0	0	0	0	0	1	0	0	0	0	2	2	2	2	2	2	3	3	3	3	3	4	3	5	1	2	5	4	3	1
136	2	2	2	2	1	1	2	3	川北医学院	骨二科	3	0	1	0	0	1	0	1	1	0	0	0	0	1	0	0	0	0	0	2	2	2	2	2	3	2	2	2	3	3	3	3	1	5	4	3	3	5	2
137	2	3	2	2	1	1	2	3	河西学院	妇科	1	0	0	1	1	0	0	0	0	0	0	1	0	0	0	0	0	0	0	2	4	3	3	3	3	4	4	4	4	4	4	3	1	2	3	5	5	4	2
138	2	8	2	4	3	3	2	3	广东医学院	放射科	1	1	1	1	1	1	1	1	1	1	1	1	1	0	1	1	1	1	1	2	2	2	2	2	2	2	2	2	2	4	2	2	3	2	3	2	1	1	3
139	2	3	2	3	3	2	2	3	中国医科大学	心血管内科二病区	1	1	0	1	0	0	0	0	0	0	1	1	1	1	1	1	0	1	0	2	3	3	3	3	3	3	3	3	3	3	3	3	2	4	3	2	4	1	2
140	2	3	2	3	3	3	1	3	川北医学院	麻醉手术中心	1	0	0	1	0	0	0	0	0	0	0	0	0	0	0	0	0	0	0	2	4	2	3	3	3	3	4	3	2	4	3	4	4	4	2	4	4	4	4
141	2	3	2	3	3	2	1	3	成都中医药大学	神经内科	1	0	0	0	0	0	0	0	0	0	0	0	0	0	0	0	0	0	1	2	3	3	3	3	3	3	3	3	3	3	3	3	3	3	5	2	4	2	2
142	2	6	2	2	1	1	2	3	川北医学院	消化内科	1	0	0	0	0	1	0	1	0	0	1	0	0	0	0	0	0	0	0	2	3	3	3	3	3	3	3	3	3	3	3	3	1	4	3	1	2	2	5
143	2	3	2	3	2	1	2	3	西南医科大学	儿科	1	1	0	0	0	0	1	1	1	0	0	1	1	1	1	1	0	1	0	2	5	3	3	3	3	5	5	3	3	3	3	3	4	4	5	1	2	4	2
144	2	2	2	3	3	2	1	3	攀枝花学院	骨科	1	0	0	0	0	0	0	0	0	0	0	1	0	0	1	0	0	0	0	2	3	3	1	1	1	1	1	1	1	2	2	2	4	3	3	1	2	4	4
145	2	8	2	4	3	2	2	2	中央广播电视大学	供应室	2	1	0	1	1	0	0	0	0	0	1	1	0	0	0	1	0	0	0	2	5	5	5	5	5	5	5	4	3	5	4	4	2	2	5	2	2	3	4
146	2	8	2	2	1	1	2	2	成都医学院	功能科	1	1	0	1	1	1	0	1	1	0	1	1	1	1	1	1	0	1	0	2	3	2	3	4	3	5	4	3	4	3	4	3	4	2	2	1	3	5	2
147	2	8	2	2	1	1	2	3	川北医学院	ICU	3	1	1	1	1	0	0	0	0	0	0	0	0	0	0	0	0	0	0	2	2	2	2	2	2	2	2	2	2	2	2	2	3	4	3	1	5	2	2
148	2	3	2	1	5	3	1	2	四川电大	麻醉手术中心	1	1	0	1	1	0	0	0	0	0	1	0	0	0	0	0	0	0	0	2	2	2	2	3	3	3	3	2	2	3	3	3	3	2	3	3	2	2	3
149	2	3	2	3	2	1	2	3	四川大学	重症医学科	1	0	1	0	0	0	1	1	0	1	0	1	0	0	1	0	0	1	0	2	2	2	2	2	2	3	3	2	2	3	2	1	2	2	3	3	3	2	2
150	2	8	2	3	4	2	1	3	泸州医学院	妇产科	1	0	0	0	0	0	0	1	0	0	0	0	0	1	0	0	0	0	0	2	3	3	3	3	3	3	3	3	3	3	3	3	3	3	3	3	3	3	3
151	2	2	2	4	4	1	1	3	吉林大学	核医学科	3	1	0	1	1	1	0	0	0	0	1	1	0	0	1	0	0	1	0	2	3	2	3	3	3	2	2	2	2	2	2	2	3	3	2	2	3	2	3
152	2	20	2	2	1	1	2	3	四川大学	医学装备科	1	1	0	1	1	0	1	0	0	0	0	0	0	0	0	0	0	0	0	2	2	2	2	2	2	5	2	2	2	2	2	2	5	2	5	5	2	3	3
153	2	20	2	2	2	1	2	3	川北医学院	急诊科	1	0	0	0	0	1	0	0	0	0	1	0	0	0	0	0	0	1	0	2	2	2	2	2	2	2	2	2	2	3	3	2	2	2	2	2	4	2	2
154	2	8	2	2	1	1	2	2	川北医学院	体检中心	1	1	1	1	1	1	1	1	1	1	1	1	1	1	1	1	1	1	0	2	2	2	3	3	2	4	3	2	2	2	2	2	2	2	2	2	2	3	3
155	2	2	2	4	5	2	1	3	四川大学	影像科	1	0	0	0	1	0	0	0	0	0	1	1	0	0	1	1	0	1	0	2	2	2	2	2	2	2	2	2	2	2	3	2	3	3	3	4	4	2	2
156	2	20	2	3	3	2	2	3	川北医学院	医学康复科	2	1	0	0	1	1	0	1	0	1	1	0	0	0	1	0	0	0	0	2	3	2	2	3	2	2	2	3	2	3	3	2	4	3	4	4	4	3	4
157	2	20	2	3	2	1	2	3	成都医学院	急诊科	1	1	1	0	0	1	0	0	0	0	0	0	0	0	0	1	1	1	0	2	3	3	3	3	3	3	3	3	3	3	3	3	2	2	2	2	2	2	2
158	2	8	2	4	3	2	2	2	广元职工医学院	内科	2	1	1	1	1	1	1	1	1	1	1	1	1	1	1	1	1	1	0	2	2	2	2	3	4	4	3	3	3	4	4	2	4	3	4	4	4	4	3
159	1	1	2	2	2	1	2	3	四川大学	眼耳鼻喉科	3	1	1	0	0	0	0	1	1	0	0	0	0	0	0	0	0	1	0	2	3	3	3	3	3	5	3	3	4	3	5	3	5	5	3	3	3	3	5
160	1	1	2	2	1	1	2	3	西南医科大学	消化内科	3	1	1	1	1	1	0	1	1	0	0	1	1	1	1	0	0	1	0	2	3	2	3	3	3	3	3	3	3	3	3	3	2	2	2	4	3	1	1
161	2	20	2	3	2	1	2	3	国家开放大学	新生儿科	3	1	1	1	1	1	1	1	1	1	1	1	1	1	1	1	0	1	0	2	2	2	2	2	2	2	2	2	2	4	4	2	1	4	2	4	4	3	1
162	1	1	2	2	2	1	2	2	川北医学院	呼吸与危重症医学科	3	1	1	0	0	1	0	1	1	0	1	1	1	1	1	1	0	1	0	2	3	2	2	3	3	3	3	3	3	3	4	2	3	3	3	1	4	2	1
163	2	3	2	3	3	2	2	3	成都医学院	麻醉介入中心	1	0	0	0	0	0	1	1	1	0	0	0	0	0	0	0	0	0	0	2	3	3	3	3	3	3	3	3	3	3	3	3	5	1	3	3	5	3	4
164	1	1	2	3	3	2	2	3	成都中医药大学	肾病内科	3	1	1	1	1	1	0	1	1	0	1	1	1	0	1	1	1	1	0	2	3	3	3	3	3	3	3	3	3	4	4	3	1	4	3	3	4	4	1
165	2	3	2	4	5	2	1	3	川北医学院	肾内科血透室	1	1	0	1	0	0	0	0	0	0	0	0	0	0	1	0	0	0	0	2	4	1	3	3	4	5	3	3	3	3	3	3	5	1	2	5	4	3	1
166	1	1	2	2	2	1	2	3	武汉大学	肾病科	1	1	1	1	1	1	0	1	1	0	0	0	1	0	1	1	1	1	0	2	3	3	3	3	3	3	3	3	3	3	3	3	1	5	4	3	3	5	2
167	1	1	2	4	5	3	1	3	成都中医学院	消化内科	3	1	1	1	1	1	1	1	1	0	0	1	1	1	1	1	0	1	0	2	4	4	3	3	3	5	4	2	5	5	5	2	1	2	3	5	5	4	2
168	2	3	2	2	1	1	2	3	甘肃中医药大学	神经内科	1	1	0	1	1	0	0	1	1	0	0	1	0	0	0	0	0	1	0	2	4	4	4	4	3	4	3	3	3	4	4	3	3	2	3	2	1	1	3
169	1	1	2	2	2	1	2	3	成都医学院	骨三	2	0	0	0	0	0	0	1	0	0	0	0	0	1	0	0	1	1	0	2	3	3	3	3	3	3	3	3	4	4	4	3	4	4	2	4	4	4	4
170	1	1	2	2	2	1	2	3	成都中医药大学	妇产科	1	0	0	0	0	0	0	0	1	0	0	1	1	0	0	0	0	0	0	2	3	3	3	3	3	3	4	4	4	4	4	3	3	3	5	2	4	2	2
171	1	1	2	4	5	3	1	3	成都中医药大学	肛肠科	3	1	1	1	1	1	0	1	1	0	0	1	1	0	1	1	0	1	0	2	4	4	4	3	3	3	3	3	4	4	4	3	1	4	3	1	2	2	5
172	2	2	2	2	1	1	2	2	四川科技	神内	1	0	0	0	0	0	0	1	1	0	0	0	0	0	0	0	0	0	0	2	3	2	3	3	4	4	4	3	4	4	4	3	4	4	5	1	2	4	2
173	1	1	2	2	2	2	2	3	成都中医药大学	中医经典科	3	1	1	1	1	1	0	1	1	1	0	1	1	1	1	1	0	1	0	2	3	3	3	3	3	3	3	3	3	3	3	3	4	3	3	1	2	4	4
174	1	1	2	3	4	2	1	3	成都中医药大学	针灸科一病区	3	1	1	1	1	1	1	1	1	0	1	1	1	1	1	1	1	1	0	2	4	3	3	5	4	4	4	3	4	5	5	3	3	1	3	3	5	4	5
175	1	1	2	3	2	1	1	3	成都中医药大学附属医院针灸学校	儿科	1	1	0	0	0	0	0	1	1	0	0	0	0	1	0	0	0	1	0	2	5	5	4	4	3	4	3	3	4	4	5	4	2	4	1	2	1	5	5
176	1	1	2	3	2	2	2	3	成都医学院	骨一科	3	1	0	0	0	0	0	1	1	0	0	0	1	0	0	0	0	1	0	2	4	3	3	4	3	4	4	4	3	4	5	4	4	2	2	1	3	5	2
177	1	1	2	2	1	2	2	3	成都中医药大学	骨科	2	1	1	0	1	1	0	1	1	0	0	0	0	1	1	1	0	1	0	2	3	2	3	3	3	4	4	3	3	4	4	3	3	4	3	1	5	2	2
178	1	1	2	2	1	2	2	2	广元市中医医院	针灸三病区	3	1	0	0	0	0	0	0	0	0	0	0	0	1	1	0	0	1	0	2	4	4	4	3	3	4	3	3	4	4	4	4	5	3	3	2	5	4	3
179	1	1	2	2	1	2	2	3	西京学院	呼吸与危重症医学科	2	0	1	0	0	0	0	1	1	0	0	0	1	0	0	0	0	1	0	2	3	3	3	3	3	3	3	3	3	3	3	3	4	4	3	3	3	2	4
180	2	2	2	2	1	2	1	3	成都医学院	血液内科	2	0	0	0	0	0	0	1	0	0	0	0	0	1	0	0	0	0	0	2	3	3	3	3	3	3	3	3	3	3	3	3	3	3	3	3	3	3	4
181	1	1	2	3	3	2	2	3	成都中医药大学	老年医学科	3	1	1	1	1	1	0	1	1	0	1	1	1	1	1	1	1	1	0	2	1	1	1	1	1	1	1	1	3	3	4	1	5	5	4	5	5	2	5
182	1	1	2	3	3	2	1	3	成都中医药大学	针灸二病区	2	1	1	0	0	1	0	1	1	0	0	0	0	1	1	0	0	1	0	2	3	2	2	3	2	3	3	1	3	3	4	1	5	5	3	3	5	3	5
183	1	1	2	2	1	1	2	3	西南财经大学天府学院	神经内科	2	1	0	0	0	0	0	1	1	1	0	1	1	0	0	0	0	1	0	2	3	3	3	3	3	3	3	3	3	4	4	2	3	1	1	1	1	1	4
184	2	8	2	3	2	2	2	3	泸州医学院	妇产科	1	1	0	0	0	0	0	0	0	0	0	0	0	0	0	0	0	0	0	2	4	3	4	3	3	4	4	4	4	3	3	3	4	2	2	3	5	3	3
185	1	1	2	1	5	3	1	3	成都中医药大学	河街门诊	3	1	0	1	0	0	0	1	1	0	0	1	0	1	1	1	0	1	1	2	3	3	3	3	3	4	4	3	3	3	4	3	5	4	3	3	4	1	5
186	2	6	2	2	1	1	2	3	西南财经大学天府学院	肝胆外科	2	1	0	0	1	0	0	0	1	1	0	1	0	0	0	0	0	0	1	2	3	3	3	3	3	3	3	3	3	3	3	3	3	3	3	3	3	3	3
187	2	8	2	2	1	1	2	2	四川中医药高等专科学校	皮肤科／医疗美容科	1	0	0	0	0	0	0	0	0	0	0	1	0	0	0	0	0	0	0	2	2	2	2	2	2	2	2	2	2	2	2	2	4	2	3	3	2	3	3
188	1	1	2	2	2	1	2	3	成都中医药大学	消化内科	1	1	0	0	0	1	0	1	0	0	0	0	0	0	0	0	0	0	0	2	3	3	3	3	3	3	3	3	3	3	3	3	3	3	3	3	3	3	3
189	2	2	1	2	2	1	2	3	川北医学院	icu	2	0	1	0	0	1	0	0	1	0	0	0	0	0	1	1	1	1	0	2	4	3	3	4	4	4	3	4	3	4	4	3	2	2	2	4	3	1	1
190	1	1	2	4	5	2	1	3	成都中医药大学	血液净化中心	3	0	1	1	1	0	0	1	1	0	0	1	1	0	1	1	0	1	0	2	3	3	3	3	3	3	3	3	3	4	4	3	1	4	2	4	4	3	1
191	2	14	2	2	2	1	2	3	四川中医药高等专科学校	普外科	2	1	0	0	0	1	0	1	1	0	0	0	0	0	0	0	0	0	0	2	4	4	4	4	4	4	4	4	4	4	4	4	3	3	3	1	4	2	1
192	2	20	2	3	3	2	2	3	成都医学院	手术室	1	0	0	0	0	0	0	0	0	0	1	0	0	0	1	0	0	1	0	2	3	1	1	3	3	3	3	3	1	1	1	1	5	1	3	3	5	3	4
193	1	1	2	4	5	3	1	3	成都医学院	新生儿科	3	1	1	1	1	1	1	1	1	1	1	1	1	1	1	1	0	0	0	2	2	2	3	3	2	3	1	1	1	2	2	2	3	2	1	2	3	4	4
194	2	2	2	3	3	1	2	3	成都中医学院	新生儿科	1	1	1	0	0	0	1	1	0	0	1	1	0	0	0	0	0	1	0	2	3	3	3	3	3	3	3	3	3	3	3	3	2	1	3	5	2	3	5
195	1	1	2	3	3	2	1	3	成都中医药大学	消化内科	3	1	0	0	0	1	0	1	1	0	0	0	1	0	0	0	0	0	0	2	3	3	3	3	3	3	3	3	3	3	3	3	1	4	3	3	4	4	1
196	2	3	2	2	1	2	2	3	甘肃省中医药大学	呼吸与急危重症医学科	1	0	0	1	1	0	0	0	0	0	0	0	0	0	0	0	0	0	0	2	3	3	3	3	3	3	3	3	3	3	3	3	5	1	2	5	4	3	1
197	2	3	2	2	1	2	2	3	河西学院	呼吸内科	1	1	0	1	1	0	1	0	0	0	0	0	0	0	0	0	0	0	0	2	3	3	3	3	3	4	4	3	4	4	3	2	1	5	4	3	3	5	2
198	1	1	2	3	2	1	2	3	成都中医药大学	呼吸与危重症医学科	3	1	1	1	1	1	1	1	1	0	1	1	1	0	1	1	0	1	0	2	3	3	3	3	3	3	3	1	4	4	5	2	1	2	3	5	5	4	2
199	1	1	2	4	5	3	1	3	成都中医药大学	呼吸科	3	1	1	1	1	1	1	1	1	0	0	0	1	0	1	1	0	0	0	2	3	3	3	3	3	3	3	2	3	2	4	3	3	2	3	2	1	1	3
200	1	1	2	3	2	2	2	3	成都中医药大学	老年医学科三病区	1	1	1	0	1	1	0	1	1	0	1	1	1	0	1	1	0	1	0	2	2	2	2	3	2	2	3	2	2	2	3	2	3	3	5	2	4	2	2
201	1	1	2	3	3	2	1	3	成都中医药大学	针灸科三病区	3	1	1	0	1	0	0	1	1	1	0	0	0	1	0	0	0	1	0	2	3	3	3	4	3	3	4	3	5	4	5	3	1	4	3	1	2	2	5
202	1	1	2	3	4	2	1	2	四川省广播电视大学	重症医学科	3	1	1	1	0	1	0	1	1	0	0	1	1	0	1	1	1	1	0	2	3	3	3	2	3	2	3	3	5	4	5	4	4	4	5	1	2	4	2
203	2	6	2	3	3	2	2	3	达州职业技术学院	急诊科	1	0	0	0	0	0	0	0	0	0	0	0	0	0	0	1	0	0	1	2	3	3	3	2	2	2	2	3	2	2	3	2	4	3	3	1	2	4	4
204	1	1	2	4	5	3	1	3	成都中医药大学	骨一科	3	1	1	1	1	1	0	1	1	0	0	0	1	0	1	0	0	1	0	2	2	1	1	2	1	3	1	1	1	3	3	1	3	1	3	3	5	4	5
205	1	1	2	3	3	2	1	3	达州职业技术学院	消化内科	2	1	0	0	0	1	0	1	1	0	0	0	0	0	0	0	0	0	0	2	3	3	3	3	3	4	4	2	4	4	5	2	2	4	1	2	1	5	5
206	1	1	2	2	1	1	2	3	延安大学西安创新学院	老年医学科三病区	3	1	1	1	0	1	1	1	1	0	1	1	1	0	1	1	0	1	0	2	4	2	3	5	3	3	4	3	3	4	4	3	2	2	5	2	2	3	4
207	1	1	2	3	3	1	2	2	川北医学院	老年科	3	1	1	0	0	1	0	1	1	0	0	1	1	0	1	0	0	1	0	2	4	4	4	4	4	5	5	4	5	4	4	4	4	2	2	1	3	5	2
208	1	1	2	3	3	2	2	3	成都中医药大学	消化内科	3	1	1	1	1	1	0	1	1	0	0	0	1	0	1	0	0	0	0	2	3	2	2	2	2	4	2	2	4	3	3	3	3	4	3	1	5	2	2
209	1	1	2	3	2	1	2	3	成都中医药大学	消化内科	3	1	0	0	0	1	0	1	1	0	0	0	1	0	0	0	0	0	0	2	3	2	3	3	2	3	3	2	4	3	4	2	5	3	3	2	5	4	3
210	2	8	2	4	5	3	1	3	四川广播电视大学	外科	2	0	0	0	0	1	0	1	0	0	0	1	1	0	1	0	0	0	0	2	2	2	2	2	2	2	2	2	2	2	2	2	3	3	2	3	4	2	3
211	2	8	2	3	3	2	2	3	北京中医药大学	泌尿神外科	2	1	0	0	0	0	0	0	1	0	0	0	1	0	0	0	0	0	0	2	2	2	2	4	4	4	4	3	3	4	4	2	4	2	2	2	4	2	4
212	2	20	2	2	1	1	2	2	广元职工医学院	康复科	1	1	0	0	1	1	0	1	0	1	1	1	1	1	1	1	1	1	0	2	3	3	3	3	3	3	3	3	3	3	3	3	4	4	4	4	4	4	4
213	1	1	2	2	1	1	2	3	西南医科大学	消化内科	3	1	1	1	0	1	0	1	0	0	0	0	1	0	1	0	0	1	0	2	3	2	3	3	3	4	3	2	3	3	4	3	4	4	3	3	4	3	4
214	2	6	2	4	5	1	1	2	四川广播电视大学	消化内科	1	0	0	0	0	0	0	0	0	0	1	1	0	0	1	0	0	0	0	2	3	3	3	3	3	3	3	3	3	3	3	3	3	3	3	3	3	3	3
215	1	1	2	3	2	1	2	3	成都中医药大学	重症医学科	3	0	1	1	1	1	1	1	1	0	1	1	1	0	1	1	1	1	0	2	3	3	3	3	3	5	3	1	3	2	5	1	5	5	5	5	5	3	5
216	2	3	2	3	3	1	2	2	成都医学院	急诊科	1	1	0	1	0	1	0	0	0	0	1	0	0	0	0	1	0	0	0	2	3	3	3	2	3	3	3	2	2	3	3	2	4	4	4	4	4	3	4
217	2	14	2	2	1	1	2	2	四川卫生康复职业学院	内科	3	1	0	0	0	0	0	0	1	0	0	0	0	1	1	0	0	1	0	2	3	3	3	3	3	3	3	3	3	3	3	3	3	3	3	3	3	3	3
218	2	20	2	3	3	2	2	3	成都医学院	妇科	1	0	0	0	0	1	0	0	0	0	0	1	0	0	1	0	0	0	0	2	2	2	2	4	3	1	1	3	4	3	1	3	2	2	2	4	3	1	1
219	2	14	2	2	1	1	2	3	眉山药科职业学院	内3科	2	1	1	1	1	1	0	1	0	0	1	1	0	1	1	1	0	1	0	2	1	4	2	4	4	3	1	4	4	1	2	5	1	4	2	4	4	3	1
220	2	2	2	4	4	2	1	3	成都医学院	儿科	1	0	0	0	0	0	0	1	0	0	0	0	0	0	0	0	0	0	0	2	3	3	3	1	4	2	1	2	2	5	2	1	3	3	3	1	4	2	1
221	2	6	2	2	1	1	2	2	达州职业技术学院	呼吸内科	1	0	0	0	0	0	0	0	0	0	1	0	0	0	0	0	0	0	0	2	5	1	3	3	5	3	4	1	2	4	5	1	5	1	3	3	5	3	4
222	1	1	2	2	1	1	2	3	西安交通大学城市学院	神经内科	1	0	0	0	0	0	0	1	1	0	0	0	0	0	1	0	0	0	0	2	3	2	1	2	3	4	4	5	3	4	1	1	3	2	1	2	3	4	4
223	1	19	2	2	3	2	2	3	成都中医药大学	针灸康复科	3	1	1	1	1	1	1	1	1	1	1	1	1	1	1	1	0	1	1	2	2	1	3	5	2	3	5	4	4	2	4	4	2	1	3	5	2	3	5
224	1	19	2	2	1	1	2	2	达州职业技术学院	针灸康复科	3	1	1	1	1	1	1	1	1	1	1	1	1	1	1	1	0	1	0	2	1	4	3	3	4	4	1	4	4	1	4	1	1	4	3	3	4	4	1
225	1	19	2	2	2	1	2	3	川贝医学院	外科	2	1	0	1	1	1	0	0	1	0	0	0	1	1	1	1	0	1	0	2	5	1	2	5	4	3	1	3	3	5	5	5	5	1	2	5	4	3	1
226	1	19	2	2	2	2	1	3	四川大学	外科	3	1	0	0	1	1	0	0	1	0	0	1	1	1	0	1	0	1	0	2	1	5	4	3	3	5	2	1	2	3	3	3	1	5	4	3	3	5	2
227	1	19	2	2	2	1	2	3	成都中医院大学	外科	3	1	1	0	1	1	0	0	1	0	0	0	1	1	1	1	0	1	0	2	1	2	3	5	5	4	2	1	3	2	5	3	1	2	3	5	5	4	2
228	1	19	2	2	1	1	2	2	川北医学院	针灸康复科	3	1	1	1	1	0	1	1	1	1	0	0	1	0	1	0	0	0	0	2	3	2	3	2	1	1	3	3	2	2	5	2	3	2	3	2	1	1	3
229	1	19	2	2	2	1	2	3	成都中医药大学	内科	3	1	1	1	1	1	0	1	1	0	0	0	1	1	1	1	0	1	0	2	2	4	3	2	4	1	2	2	2	4	5	2	2	4	3	2	4	1	2
230	1	19	2	2	1	1	2	3	川北医学院	门诊部	3	1	1	0	0	1	0	1	1	1	1	1	1	1	1	1	0	1	0	2	4	4	2	4	4	4	4	1	3	4	3	3	4	4	2	4	4	4	4
231	1	19	2	2	1	1	2	2	川北医学院	老年病科	3	1	1	1	1	1	0	1	1	0	0	0	1	0	0	0	0	1	0	2	3	3	5	2	4	2	2	2	4	3	4	2	3	3	5	2	4	2	2
232	1	1	2	3	3	1	2	3	成都中医药大学	老年医学科	3	1	1	1	1	1	0	1	1	0	1	1	1	0	1	1	0	1	0	2	1	4	3	1	2	2	5	2	4	3	4	2	1	4	3	1	2	2	5
233	1	1	2	1	5	1	1	3	成都中医药大学	消毒供应中心	1	1	0	1	0	0	0	0	0	0	0	0	0	0	0	0	0	0	0	2	4	4	5	1	2	4	2	1	3	4	3	5	4	4	5	1	2	4	2
234	1	1	2	2	2	1	2	2	西南医科大学	神经内科	3	1	1	0	0	0	0	1	1	1	0	1	1	1	1	1	1	1	0	2	4	3	3	1	2	4	4	1	4	5	2	2	4	3	3	1	2	4	4
235	1	1	2	3	3	2	2	3	成都中医药大学	手术室	2	1	1	1	1	1	0	1	0	0	0	1	0	1	1	1	1	0	0	2	3	1	3	3	5	4	5	3	4	2	1	1	3	1	3	3	5	4	5
236	1	1	2	1	5	1	1	3	成都中医药大学	消毒供应中心	3	1	1	1	1	1	0	1	1	0	0	1	0	0	1	1	0	1	0	2	2	4	1	2	1	5	5	4	2	1	4	1	2	4	1	2	1	5	5
237	1	1	2	4	5	1	1	2	四川大学	手术室	1	1	1	0	0	0	0	0	0	0	0	0	0	0	0	0	0	0	0	2	2	2	5	2	2	3	4	2	1	1	3	3	2	2	5	2	2	3	4
238	1	1	2	3	3	2	2	3	成都中医药大学	肾病感染科	2	1	0	0	0	0	0	1	1	0	0	0	0	0	0	0	0	0	0	2	4	2	2	1	3	5	2	3	4	1	3	1	4	2	2	1	3	5	2
239	1	1	2	2	2	2	2	3	雅安职业技术学院	针二	3	1	1	1	1	0	0	1	1	0	0	1	1	1	1	1	0	1	0	2	3	4	3	1	5	2	2	1	1	4	3	1	3	4	3	1	2	2	2
240	1	17	2	4	5	1	1	2	四川广播电视大学	急诊科	3	1	0	1	1	0	1	1	1	0	0	0	0	0	1	1	0	1	0	2	5	3	3	2	5	4	3	2	1	1	1	4	5	3	3	2	1	4	2
241	1	1	2	3	3	2	2	3	达州职业技术学院	针二	3	1	1	0	1	1	0	1	1	0	0	0	0	1	1	1	0	1	0	2	2	4	4	4	4	4	4	2	4	4	4	4	4	4	4	4	3	3	3
242	1	1	2	2	2	1	2	3	成都医学院	肿瘤科	1	1	1	1	1	1	0	1	1	0	1	1	1	1	1	1	0	1	0	2	4	4	3	3	3	4	4	4	4	4	4	4	4	4	4	4	5	1	3
243	1	1	2	4	5	2	1	3	成都中医药大学	消毒供应中心	3	1	1	1	1	1	0	1	1	0	1	1	1	0	1	1	0	0	0	2	3	3	3	3	3	3	3	3	3	3	3	3	4	4	4	4	3	2	1
244	1	1	1	2	1	1	2	3	齐齐哈尔医学院	急诊	3	1	1	0	0	0	0	1	1	0	1	1	1	1	1	0	0	1	0	2	3	1	2	3	3	3	3	3	3	4	4	2	4	5	3	2	1	4	3
245	1	1	1	2	2	1	2	3	成都中医药大学	急诊科	2	0	1	0	0	0	0	1	1	0	0	0	0	0	0	0	0	0	0	2	4	4	4	4	5	5	5	2	2	5	5	3	5	5	5	5	1	2	3
246	1	1	2	3	2	1	2	2	四川中医药高等专科学校	肿瘤科	2	1	0	1	1	0	0	1	0	0	0	0	0	0	0	0	0	0	0	2	3	3	3	3	3	3	3	2	3	3	3	2	4	4	4	4	3	2	3
247	1	1	2	3	3	2	2	3	川北医学院	急诊	3	1	1	1	1	1	1	1	1	0	0	1	1	0	1	1	0	1	0	2	4	4	4	4	3	4	3	4	4	5	5	4	5	5	5	5	2	4	3
248	1	1	1	2	2	2	2	3	成都中医药大学	急诊科	2	1	1	0	1	1	0	1	1	0	0	1	1	0	1	0	0	1	0	2	3	2	3	2	3	4	4	2	3	4	5	2	5	5	4	5	3	3	5
249	1	1	2	4	5	2	1	2	四川广播电视大学	手术室	3	1	0	1	0	0	0	1	1	0	0	0	0	0	1	1	0	1	0	2	3	3	2	2	1	2	2	2	3	3	4	2	4	3	4	3	1	4	3
250	1	15	2	4	4	1	1	3	遵义医学院	护理部	3	1	0	0	0	1	0	1	1	0	0	0	0	0	1	0	0	1	0	2	3	4	4	3	2	3	3	2	4	4	4	3	4	3	3	3	4	3	3
251	1	1	2	3	3	2	2	3	成都中医药大学	手术室	3	1	0	1	1	1	1	1	1	0	0	1	1	0	1	1	0	1	0	2	2	2	3	3	1	2	2	2	2	3	3	1	5	3	5	5	3	1	3
252	1	15	2	4	4	2	1	3	中国医科大学	内一科	3	1	1	1	0	1	1	1	1	0	0	0	1	0	1	0	0	0	0	2	3	3	3	3	3	3	3	3	3	3	3	3	3	3	3	3	2	2	5
253	1	15	2	4	5	1	1	2	四川省卫生干部管理学院	内科	3	1	0	1	0	1	0	1	1	0	0	0	0	0	0	0	0	0	0	2	5	5	5	4	4	4	4	4	4	4	4	3	5	4	4	4	4	2	2
254	1	1	2	2	1	1	2	3	延安大学西安创新学院	急诊科	1	1	1	0	0	0	0	1	1	0	1	0	1	0	1	1	0	0	0	2	4	3	3	3	3	4	3	3	3	4	4	3	4	4	4	4	3	4	3
255	1	15	2	2	1	1	2	3	西南医科大学	外科	3	0	0	0	0	1	1	1	1	0	0	1	1	0	1	0	0	1	0	2	3	3	3	3	3	3	3	3	4	4	4	3	4	2	3	3	5	3	3
256	1	15	2	4	5	3	1	3	中央广播电视大学	内镜室	1	0	0	0	0	0	0	0	0	0	0	0	0	0	0	0	0	0	1	2	3	3	3	3	3	3	3	3	3	4	3	3	4	4	4	4	4	3	4
257	1	15	2	2	2	2	2	3	成都医学院	针灸康复科	2	1	1	1	1	1	0	1	1	1	1	1	1	1	1	1	1	1	0	2	3	3	3	3	3	5	3	3	3	3	3	3	3	1	3	3	3	3	3
258	1	15	2	4	5	3	1	2	广元市南充卫校	门诊	1	0	0	0	0	0	0	0	1	0	0	0	0	0	0	0	0	0	0	2	3	3	3	3	3	3	3	3	3	3	3	3	3	2	3	3	3	2	3
259	1	15	2	3	3	2	2	3	南华大学	手术室	2	1	0	1	1	1	0	1	1	0	1	1	1	0	1	1	1	1	0	2	3	2	2	3	3	3	3	2	2	3	3	2	3	2	2	2	4	3	4
260	1	1	2	2	1	1	2	3	攀枝花学院	重症医学科	3	0	1	0	0	0	0	1	1	0	0	0	1	0	1	0	0	1	0	2	4	3	4	3	3	4	4	3	3	4	4	3	4	3	3	3	3	3	4
261	1	1	2	2	1	1	2	3	攀枝花学院	针一	3	1	1	0	0	1	0	1	1	0	0	0	1	1	1	1	0	1	0	2	3	3	3	3	3	3	3	3	3	3	3	3	4	4	3	3	4	3	4
262	1	1	2	3	3	2	2	3	成都中医药大学	消化内科	3	1	1	1	1	1	0	1	1	0	1	1	1	1	1	1	1	1	0	2	3	2	2	3	3	3	3	2	3	3	3	2	5	5	3	5	5	3	5
263	1	7	2	3	3	1	2	3	南充卫校	内二科	3	1	1	0	0	0	0	1	1	0	1	0	0	1	0	0	0	0	0	2	3	1	3	1	1	5	1	1	4	1	1	3	5	5	3	3	3	3	5
264	1	15	2	4	5	3	1	2	南充卫校	门诊	1	1	0	0	0	0	0	0	1	0	0	0	0	0	0	0	0	0	0	2	3	3	3	3	3	3	3	3	3	3	3	3	3	3	3	3	3	2	3
265	1	1	2	2	1	1	2	2	四川科技学院	骨科三病区	2	0	0	0	0	0	0	1	1	0	0	1	1	0	1	0	0	1	0	2	2	2	1	1	1	2	2	2	3	3	3	1	3	2	2	3	2	2	3
266	1	1	2	2	2	1	2	3	乐山职业技术学院	针灸科一病区	3	1	1	0	1	1	0	1	1	0	1	0	0	1	0	0	0	1	0	2	3	3	3	3	3	3	3	3	3	3	3	3	4	4	3	3	4	2	4
267	1	9	2	2	2	1	2	3	成都医学院	急诊科	3	1	1	1	1	1	0	1	1	0	0	1	1	0	0	0	0	1	0	2	3	3	3	3	3	3	3	3	3	3	3	3	3	3	3	3	3	3	3
268	1	15	2	2	2	1	2	2	成都医学院	针灸康复科	3	1	0	1	1	1	0	1	0	1	1	1	1	0	1	1	1	1	0	2	3	3	3	3	3	3	3	3	4	3	4	3	5	3	5	5	5	3	5
269	1	1	2	2	2	1	2	3	川北医学院	呼吸与危重症医学科	3	1	1	0	1	1	0	1	1	1	0	1	1	1	1	1	1	1	0	2	3	2	2	3	3	3	3	3	3	3	4	2	4	4	3	4	4	3	4
270	1	7	2	3	2	2	2	3	川北医学院	肺病科	2	1	0	0	0	0	0	1	1	0	0	0	0	0	0	0	0	0	0	2	3	2	3	3	3	3	3	2	4	4	4	2	4	3	3	3	4	2	4
271	1	1	1	2	1	1	2	3	川北医学院	重症医学科	2	0	0	0	0	0	0	1	1	0	0	0	0	0	0	0	0	1	0	2	3	2	2	3	3	3	3	3	3	3	4	2	4	4	4	4	4	2	4
272	1	1	2	2	1	1	2	2	达州职业技术学院	呼吸科	2	0	1	0	0	0	0	1	1	0	0	0	1	0	0	0	0	0	0	2	3	2	3	3	2	3	3	2	3	3	4	3	4	4	3	3	4	3	4
273	1	1	2	3	2	2	2	3	川北医学院	妇产科	3	1	1	1	1	1	0	1	1	0	0	1	1	1	1	1	0	1	0	2	3	3	3	3	2	3	3	2	2	3	4	3	5	5	4	4	5	3	5
274	1	1	2	2	2	1	2	2	成都医学院	老年医学科二病区	3	1	0	0	0	0	0	1	1	0	0	1	1	0	0	0	0	1	0	2	2	2	2	4	3	1	1	3	4	3	1	3	2	2	2	4	3	1	1
275	1	1	2	2	2	1	2	3	成都医学院	老年医学科	3	1	1	1	0	1	0	1	1	0	1	1	1	0	1	1	0	1	0	2	1	4	2	4	4	3	1	4	4	1	2	5	1	4	2	4	4	3	1
276	1	1	2	3	3	2	1	3	川北医学院	老年科一病区	3	1	1	1	0	0	0	1	1	0	0	1	1	0	0	1	0	1	0	2	3	3	3	1	4	2	1	2	2	5	2	1	3	3	3	1	4	2	1
277	1	1	2	3	2	2	2	3	成都中医药大学	老年科	3	1	0	0	0	0	0	1	1	0	0	1	1	0	1	1	0	1	0	2	5	1	3	3	5	3	4	1	2	4	5	1	5	1	3	3	5	3	4
278	1	1	2	3	3	1	1	3	成都中医药大学	老年科	3	1	1	0	0	0	0	1	1	0	1	1	1	0	0	0	0	1	0	2	3	2	1	2	3	4	4	5	3	4	1	1	3	2	1	2	3	4	4
279	1	1	2	2	3	1	2	3	川北医学院	心血管	2	1	0	0	0	0	0	1	1	0	0	0	1	0	0	0	0	1	0	2	2	1	3	5	2	3	5	4	4	2	4	4	2	1	3	5	2	3	5
280	1	1	2	2	1	1	2	3	西南财经大学天府学院	肿瘤科	2	1	1	0	0	1	0	1	1	0	0	0	0	1	1	0	0	0	0	2	1	4	3	3	4	4	1	4	4	1	4	1	1	4	3	3	4	4	1
281	1	1	2	2	1	1	2	3	平顶山学院	普外科	1	0	1	0	0	1	0	1	1	0	0	0	0	0	1	0	0	1	0	2	5	1	2	5	4	3	1	3	3	5	5	5	5	1	2	5	4	3	1
282	1	1	2	3	2	2	2	3	河南大学民生学院	普外科	3	1	0	0	0	0	0	1	1	0	0	0	1	0	1	1	0	0	0	2	1	5	4	3	3	5	2	1	2	3	3	3	1	5	4	3	3	5	2
283	1	1	2	2	1	1	2	3	西南财经大学天府学院	普通外科	3	1	0	0	0	0	0	1	1	0	0	0	1	0	1	1	0	0	0	2	1	2	3	5	5	4	2	1	3	2	5	3	1	2	3	5	5	4	2
284	1	1	2	3	3	2	2	3	四川大学	内分泌风湿免疫科	3	1	1	0	0	0	0	1	1	0	0	1	0	1	0	0	0	1	0	2	3	2	3	2	1	1	3	3	2	2	5	2	3	2	3	2	1	1	3
285	1	1	2	2	3	2	2	3	成都中医药大学	骨二	3	1	1	0	0	0	1	1	1	0	0	1	1	1	1	1	1	1	0	2	2	4	3	2	4	1	2	2	2	4	5	2	2	4	3	2	4	1	2
286	1	1	2	1	5	1	1	3	成都中医药大学	骨科	3	1	1	1	1	1	1	1	1	0	0	1	1	1	1	0	0	1	0	2	4	4	2	4	4	4	4	1	3	4	3	3	4	4	2	4	4	4	4
287	1	1	2	3	3	2	1	3	成都中医药大学	心血管内科	3	1	1	0	1	1	0	1	1	0	1	0	1	1	1	1	0	1	0	2	3	3	5	2	4	2	2	2	4	3	4	2	3	3	5	2	4	2	2
288	1	1	2	3	3	1	2	2	广元职工医学院	普通外科	2	1	1	0	0	0	0	1	1	0	0	0	1	0	0	0	0	0	0	2	1	4	3	1	2	2	5	2	4	3	4	2	1	4	3	1	2	2	5
289	1	1	2	3	2	1	2	3	中医药大学	骨科二病区	3	0	0	0	0	0	1	0	0	0	0	1	0	0	0	0	0	0	0	2	4	4	5	1	2	4	2	1	3	4	3	5	4	4	5	1	2	4	2
290	1	1	2	3	3	1	2	3	川北医学院	重症监护室	1	1	0	0	0	0	0	0	1	0	0	0	0	0	0	0	0	1	0	2	4	3	3	1	2	4	4	1	4	5	2	2	4	3	3	1	2	4	4
291	1	1	1	2	1	1	1	2	西安海棠职业学院	重症监护室	2	0	0	0	0	1	0	1	1	0	0	0	0	0	0	0	0	1	0	2	3	1	3	3	5	4	5	3	4	2	1	1	3	1	3	3	5	4	5
292	1	1	2	2	1	1	2	3	四川卫生康复职业学院	重症医学科	3	1	1	1	0	1	0	1	1	0	0	1	0	0	0	1	0	1	0	2	2	4	1	2	1	5	5	4	2	1	4	1	2	4	1	2	1	5	5
293	1	1	2	3	3	2	2	3	川北医学院	内分泌风湿免疫	3	1	1	1	1	0	0	1	1	0	0	1	1	1	1	0	0	1	0	2	2	2	5	2	2	3	4	2	1	1	3	3	2	2	5	2	2	3	4
294	1	1	2	3	3	1	1	2	成都中医药大学	普外	2	1	1	0	0	1	0	1	1	0	0	1	1	0	1	1	0	1	0	2	4	2	2	1	3	5	2	3	4	1	3	1	4	2	2	1	3	5	2
295	1	1	2	2	1	1	2	2	四川中医药高等专科学校	普外科	3	1	1	0	0	0	0	1	1	0	0	0	1	0	0	0	0	1	0	2	3	4	3	1	5	2	2	1	1	4	3	1	3	4	3	1	5	2	2
296	1	1	2	2	2	1	2	3	川北医学院	重症医学科	1	0	1	0	0	1	0	1	1	0	0	0	1	0	0	0	0	1	0	2	5	3	3	2	5	4	3	2	1	1	1	4	5	3	3	2	5	4	3
297	1	15	1	2	2	1	2	3	成都医学院	骨科	3	0	0	0	0	1	0	1	1	0	0	1	1	0	1	1	0	0	0	2	3	3	3	3	3	4	4	3	5	4	4	3	4	3	3	3	5	3	5
298	1	1	2	3	3	2	1	3	达州职业技术学院	消化内科	2	1	1	0	0	1	0	1	1	0	0	0	0	0	0	0	0	0	0	2	3	3	3	3	3	3	3	3	3	3	3	3	3	3	3	3	3	3	3
299	1	1	2	4	1	1	1	3	成都中医药大学	急诊科	3	1	1	1	1	1	0	1	1	0	0	1	1	0	1	1	0	1	0	2	3	3	3	3	3	3	3	3	4	3	4	1	5	5	4	4	5	2	5
300	1	1	1	2	1	1	2	3	川北医学院	歪三科	1	1	0	0	0	0	0	1	1	0	0	0	1	0	1	0	0	1	0	2	4	4	4	4	4	4	4	4	4	4	4	4	4	3	3	3	3	3	4
301	1	9	2	2	3	1	2	3	成都医学院	外科	3	1	0	0	0	0	0	1	1	0	0	0	1	1	0	1	0	0	0	2	3	3	3	3	3	4	3	3	3	3	3	3	4	2	4	4	4	3	5
302	1	9	2	3	2	1	2	3	成都医学院	重症医学科	2	1	0	0	0	1	0	1	1	0	1	1	1	0	1	1	0	1	0	2	3	3	3	3	2	2	2	2	2	2	2	2	4	4	3	4	4	2	4
303	1	9	2	2	2	1	2	3	西南医科大学	妇产科	3	1	0	0	0	1	0	1	1	0	0	1	1	0	1	1	0	1	0	2	2	2	2	2	2	2	2	2	2	2	2	2	4	2	2	2	4	2	4
304	1	9	2	2	1	1	2	2	广元职工医学院	外一科	2	1	0	0	0	0	0	1	1	0	0	0	1	0	0	0	0	0	0	2	3	3	3	3	3	3	3	3	3	3	4	2	4	3	3	4	4	4	4
305	1	9	2	3	2	2	2	3	国家开放大学	骨科	3	1	0	1	1	1	0	1	1	0	0	0	1	0	1	1	0	0	0	2	3	3	3	3	3	3	3	3	3	3	3	3	4	3	4	4	4	3	4
306	1	9	2	4	1	2	1	2	国家开放大学	针灸康复科	3	1	0	0	1	0	0	1	0	1	0	1	1	0	0	0	0	0	0	2	3	3	3	2	3	3	3	2	3	2	4	1	4	2	4	4	4	3	4
307	2	2	2	4	1	2	1	3	利州中专	急诊科	2	1	1	0	0	0	0	0	0	0	0	1	0	0	0	0	0	0	0	2	4	4	4	4	2	2	2	2	2	4	2	2	4	4	3	3	3	3	3
308	2	18	2	2	1	1	2	2	成都中医药大学	康复综合科	2	1	0	0	0	0	0	1	1	0	0	0	0	0	1	0	0	0	0	2	2	2	2	2	2	3	3	2	2	2	2	3	3	2	3	3	3	2	3
309	2	20	2	4	4	1	1	2	四一0职工医院	口腔	1	0	0	0	0	0	0	0	0	0	1	0	0	0	0	0	0	1	0	2	3	2	2	2	2	2	2	2	2	3	3	2	3	3	3	3	3	2	3
310	1	15	2	4	1	1	1	2	四川大学	手术室	1	0	0	0	0	1	0	1	0	0	0	0	0	0	0	0	0	1	0	2	4	3	3	3	3	3	3	2	2	3	3	2	2	2	2	2	3	2	3
311	1	7	2	3	2	1	2	3	川北医学院	内科	2	1	1	1	1	1	0	1	1	0	1	0	0	0	1	1	0	0	0	2	3	2	3	4	3	5	5	3	2	5	5	2	5	5	4	4	4	4	4
312	1	7	2	3	2	1	2	3	成都医学院	内二科	2	1	1	0	0	0	0	1	1	0	1	0	0	1	0	0	0	1	0	2	3	3	3	3	3	3	3	3	3	3	3	3	3	3	3	3	3	3	3
313	1	7	2	4	1	2	2	3	川北医学院	内科	3	1	1	0	0	1	0	1	1	0	1	0	1	0	0	1	0	0	0	2	3	3	3	3	3	3	3	2	4	3	4	2	5	4	3	2	4	2	4
314	1	7	2	3	3	2	2	3	四川大学	肿瘤科	3	1	1	0	0	1	0	1	1	0	0	1	0	0	1	1	0	1	0	2	3	3	2	1	1	3	3	1	3	3	3	1	4	4	3	1	4	1	4
315	1	7	2	3	2	2	2	3	成都医学院	治未病科	2	1	0	0	0	0	0	1	1	0	0	1	0	0	0	0	0	0	0	2	3	3	3	3	3	2	3	2	4	3	4	3	4	3	3	3	4	3	4
316	1	7	2	2	2	2	2	3	成都医学院	肿瘤科	3	1	1	1	0	1	0	1	1	0	1	0	1	0	1	1	0	1	0	2	4	4	3	2	4	3	3	2	2	5	4	2	5	5	4	4	5	2	5
317	1	7	2	4	4	2	2	3	川北医学院	骨伤科	2	0	1	0	0	0	0	1	1	0	0	0	1	0	0	0	0	0	0	2	3	3	3	3	3	3	3	3	4	3	4	3	4	3	2	2	3	1	4
318	2	14	2	2	1	1	2	2	内江卫生与健康职业学院	骨科	3	1	0	0	0	0	0	1	1	0	0	1	0	1	1	0	0	0	0	2	4	4	5	5	4	4	4	4	4	4	4	4	4	2	4	4	2	2	4
319	2	14	2	3	3	2	1	3	成都中医药大学	骨科	2	1	0	0	0	0	0	1	1	0	0	1	0	0	0	0	0	0	0	2	3	3	3	3	3	3	3	3	3	3	3	3	4	3	2	2	2	4	3
320	1	15	2	4	2	1	1	3	中国医科大学	针灸康复科	3	1	0	1	1	0	0	1	1	1	0	1	0	0	0	0	0	0	0	2	3	3	3	3	4	3	3	3	4	4	4	2	4	2	3	3	3	1	4
321	1	17	2	4	1	2	1	2	成都中医药大学	外一科	3	1	0	0	1	1	0	1	1	0	0	0	1	0	0	1	0	0	0	2	4	4	4	4	4	4	4	4	4	4	4	4	5	5	5	1	3	3	5
322	1	17	2	4	1	1	1	3	国家开发大学	老年病科	3	1	0	0	1	1	0	1	1	0	0	0	1	0	1	1	0	1	0	2	4	4	4	4	4	4	3	3	4	4	4	2	5	2	3	2	1	2	3
323	1	17	2	4	1	1	1	3	中央广播电视大学	临床护理	2	1	1	1	1	0	0	0	0	0	0	0	0	0	0	0	0	0	0	2	3	3	3	3	3	3	3	3	3	3	3	3	3	3	2	1	3	5	2
324	1	17	1	2	1	1	2	2	四川工业科技大学	手术室	1	1	0	0	0	0	0	1	1	0	0	0	0	0	0	0	0	0	0	2	4	4	4	4	4	4	4	4	4	4	4	4	5	4	5	1	2	5	4
325	1	17	2	3	4	2	1	3	泸州医学院	外科二病区	3	1	1	1	0	1	0	1	1	0	0	1	1	0	1	0	0	0	0	2	4	3	3	4	4	4	4	4	4	4	4	4	5	5	1	5	4	3	3
326	1	17	2	4	1	1	1	2	广元职工医学院	门诊手术室	3	1	0	1	1	1	0	1	1	0	1	0	1	0	1	1	0	0	0	2	4	3	2	2	4	4	4	3	4	4	4	3	5	3	1	2	3	5	5
327	1	17	2	2	2	1	2	3	广元市利州中专	老年病科	1	1	0	1	1	1	0	1	1	0	0	0	1	0	1	1	0	1	0	2	3	3	3	3	3	3	3	3	4	4	4	3	5	3	3	2	3	2	1
328	1	17	2	2	2	1	2	1	四川大学附设华西卫校	老年病科	3	1	0	1	0	0	0	1	1	0	0	0	1	0	1	1	0	1	0	2	3	3	3	3	3	3	3	3	4	4	4	3	5	3	2	4	3	2	4
329	1	17	2	2	2	2	2	1	利州中专	心血管内科	3	1	0	1	1	1	0	1	1	0	0	0	1	0	0	0	0	0	0	2	2	3	3	2	3	3	2	2	4	4	4	2	5	4	4	4	2	4	4
330	1	17	2	2	2	1	2	2	广元职工医学院	儿科	3	1	1	1	1	1	0	1	1	1	1	1	1	0	1	1	1	1	0	2	3	3	3	3	3	3	3	3	3	3	3	3	5	5	3	3	5	2	4
331	1	17	2	4	5	2	1	2	四川电大	急诊科	3	1	1	1	1	1	0	1	1	0	0	0	0	0	0	1	0	0	0	2	3	3	3	3	3	3	3	3	3	3	3	3	4	4	1	4	3	1	2
332	1	17	2	3	2	2	2	2	雅安职业技术学院	肿瘤科	3	1	1	0	0	1	0	1	1	0	0	1	1	0	0	0	0	0	0	2	4	4	4	4	4	4	4	1	4	4	4	1	5	5	4	4	5	1	2
333	1	17	2	3	2	2	2	1	成都中医药大学	手术室	3	1	0	1	1	1	1	1	1	1	0	1	1	0	1	0	0	1	0	2	4	4	3	3	3	4	4	4	3	4	4	3	5	4	4	3	3	1	2
334	1	17	2	2	2	1	2	2	沈阳医学院	外一科	2	1	0	0	0	0	0	1	1	0	0	0	1	0	0	1	0	0	0	2	3	3	3	2	2	3	2	2	3	3	3	1	4	2	2	2	5	2	2
335	1	17	2	2	1	1	2	1	牡丹江医学院	妇产科	2	1	0	0	0	1	0	1	1	0	0	0	1	0	0	0	0	0	0	2	3	3	3	3	3	3	3	2	4	3	4	2	4	2	4	2	2	1	3
336	1	17	2	4	1	1	1	2	四川广播电视大学	手术室	3	1	1	1	1	1	1	1	1	1	1	1	1	0	1	1	0	1	0	2	4	4	4	4	4	4	4	4	4	5	5	4	5	5	3	4	3	1	5
337	1	17	2	2	1	1	2	2	安阳职业技术学院	儿一	3	1	1	1	1	1	0	1	1	0	1	1	1	0	1	1	0	1	0	2	3	3	3	3	3	3	3	3	3	3	3	3	4	4	5	3	3	2	5
338	1	17	2	2	1	1	2	2	廊坊卫生职业学院	内科二病区	2	1	0	0	0	1	0	1	1	0	0	0	1	0	0	0	0	0	0	2	3	3	3	3	3	3	3	3	3	3	4	3	4	2	3	3	4	3	4
339	1	17	2	2	2	1	2	2	沈阳医学院	外一科	2	1	0	0	0	0	0	1	1	0	0	0	1	0	0	1	0	0	0	2	3	3	3	2	2	3	2	2	3	2	3	1	4	2	3	3	4	2	4
340	1	17	2	3	2	1	2	2	广元市利州中等专业学校	外科	1	1	0	0	0	1	0	1	1	0	0	0	1	0	0	1	0	1	0	2	3	3	3	3	4	4	3	3	5	3	5	3	5	3	3	3	4	3	5
341	1	17	2	3	2	2	2	3	乐山职业技术学院	外科	3	1	0	0	0	1	0	1	1	0	0	0	1	0	0	1	0	0	0	2	2	3	3	4	4	3	3	2	4	3	4	2	4	2	2	4	4	2	4
342	1	17	2	4	5	2	1	3	国家开放大学	供应室	3	1	0	1	0	1	0	1	1	0	0	0	0	0	1	0	0	1	0	2	4	3	3	2	2	5	2	2	3	3	4	1	5	2	5	5	5	2	5
343	1	17	2	3	2	1	2	3	西南医科大学	外二科	1	1	0	1	0	0	0	0	0	0	0	0	0	0	0	0	0	0	0	2	3	3	3	3	3	3	3	3	3	3	3	3	3	3	3	3	3	3	3
344	1	17	2	4	1	3	1	2	四川电大	急诊科	3	1	0	1	1	0	1	1	1	0	0	0	0	0	0	1	0	1	0	2	4	4	4	4	4	4	3	3	4	4	4	2	4	2	4	4	3	4	4
345	1	17	2	2	2	1	2	2	成都中医药大学附属医院针灸学校	针灸康复科	2	1	0	0	0	0	0	1	1	0	0	1	1	0	1	1	0	1	0	2	3	3	3	3	3	3	3	3	3	3	3	2	5	3	3	4	5	3	5
346	1	17	2	3	3	1	2	2	广元利州中等专业技术学校	外科二病区	3	1	0	1	1	0	0	1	1	0	0	0	1	0	0	0	0	0	0	2	3	3	3	2	2	3	1	1	4	4	4	2	4	2	3	4	4	1	4
347	1	17	2	3	3	1	2	2	川北医学院	内二科	3	1	1	1	1	0	0	1	1	0	0	0	1	0	1	0	0	0	0	2	3	3	3	3	3	3	3	3	3	3	3	3	3	3	3	3	3	3	3
348	1	17	2	2	3	1	2	2	成都医学院	ICU	2	1	0	0	1	0	0	1	1	0	0	0	0	0	0	0	0	0	0	2	3	3	3	3	3	3	3	3	3	3	3	3	3	3	3	3	3	3	3
349	1	17	2	4	3	2	1	3	川北医学院	内一科	2	1	0	0	0	0	0	1	1	0	0	0	0	0	0	1	0	0	0	2	4	4	4	4	4	4	4	4	4	4	4	4	4	3	3	3	3	3	4
350	1	17	2	3	3	1	2	3	四川中医药高等专科学校	内一科	1	1	0	0	0	0	0	1	1	0	0	0	1	0	1	0	0	0	0	2	3	3	3	3	4	4	4	3	3	4	4	3	4	3	4	3	3	3	4
351	2	20	2	2	4	3	2	2	川北医学院	中医科	2	1	1	1	1	1	1	1	0	0	1	1	1	1	1	1	1	1	0	3	1	4	2	4	4	3	1	4	4	1	2	5	1	1	5	5	5	5	5
352	2	20	2	2	5	3	2	2	四川天一学院	中医科	3	1	1	1	1	1	1	1	1	1	1	1	1	1	1	1	1	1	1	3	3	2	1	2	3	4	4	5	3	4	1	1	2	2	5	5	5	5	5
353	2	20	2	3	3	2	2	2	成都中医药	儿科	1	1	1	0	0	0	1	1	1	0	1	1	0	0	1	1	0	0	0	3	2	1	3	5	2	3	5	4	4	2	4	4	5	2	4	4	4	4	4
354	2	6	2	3	4	3	2	2	北京中医药大学	眼科	2	1	0	1	1	1	1	1	1	0	1	1	1	0	1	0	0	0	1	3	4	4	4	4	4	4	4	4	4	4	4	4	4	4	4	4	4	4	4
355	2	14	2	3	3	3	2	2	中国医科大学	康复医学科	3	1	0	1	1	0	1	1	0	1	0	1	0	1	1	1	0	1	1	3	4	4	4	4	4	4	4	4	4	4	4	4	5	1	3	3	5	3	4
356	2	3	2	3	3	2	2	2	成都医学院	心血管内科二病区	1	1	0	1	1	1	1	1	1	1	1	1	1	1	1	1	1	1	0	3	4	4	5	4	5	5	5	5	5	5	5	5	1	4	3	3	4	4	1
357	2	3	2	3	3	2	2	3	成都护理职业学院	儿科	3	1	1	1	1	1	1	1	0	1	0	0	1	1	0	0	0	0	0	3	5	5	5	5	5	5	5	5	5	5	5	5	5	5	5	5	5	5	5
358	2	2	2	3	4	2	2	3	攀枝花学院	心脏血管外科	3	1	1	0	0	1	0	1	1	1	1	1	1	1	1	1	0	1	0	3	4	4	4	4	4	4	4	4	4	4	4	4	5	5	4	4	5	4	5
359	2	3	2	4	5	3	1	2	川北医学院	手术室	1	0	0	0	0	0	1	0	0	0	1	0	0	0	0	0	0	0	1	3	4	2	4	4	4	4	4	3	2	4	4	1	4	4	4	4	4	4	4
360	2	2	2	3	4	3	2	3	成都医学院	血液内科	3	0	1	0	0	0	0	1	1	0	0	0	0	1	1	1	0	1	0	3	5	5	5	5	5	5	5	5	5	5	5	5	5	5	5	5	5	5	5
361	2	4	2	4	5	3	2	3	四川省省卫校	康复科	1	1	0	0	0	0	1	0	0	0	0	0	0	0	0	1	0	0	0	3	3	3	3	3	4	4	4	3	4	5	5	3	5	3	5	3	5	3	3
362	2	3	2	1	5	3	1	3	广元市职工医学院	心内科二病区	3	1	1	1	1	1	1	1	1	1	1	1	1	1	1	1	1	1	0	3	4	4	4	4	4	4	4	4	4	4	4	4	5	4	5	5	4	4	4
363	2	20	2	3	4	3	2	2	成都医学院	新生儿科	1	1	1	1	1	1	1	1	1	1	1	1	1	1	1	1	1	1	0	3	5	5	5	5	5	5	5	5	5	5	5	5	5	5	5	5	5	5	5
364	2	12	2	2	4	3	2	3	成都	内科	1	0	0	0	0	0	0	1	1	0	0	0	0	1	0	0	0	0	1	3	5	2	4	4	5	5	5	3	5	5	5	3	5	4	5	5	5	5	5
365	2	6	2	4	5	3	1	3	川北医学院	急诊科	2	0	0	0	0	1	0	0	0	0	1	0	0	0	1	1	0	0	0	3	4	3	5	5	5	5	3	3	3	5	3	3	3	4	4	4	4	4	4
366	2	3	2	3	3	2	2	3	成都医学院	麻醉手术中心	1	1	0	0	0	0	0	0	0	1	0	1	0	0	0	0	0	0	0	3	5	5	5	5	5	5	5	5	5	5	5	5	5	5	5	5	5	5	5
367	2	3	2	4	4	2	2	3	中央广播电视大学	心血管内科二病区	1	1	0	1	0	1	0	1	1	1	0	0	0	1	0	1	0	1	1	3	3	2	3	4	4	3	3	4	3	4	4	3	4	4	4	4	5	3	4
368	2	14	1	2	5	3	2	3	达州中医药职业学院	内一科	3	1	0	0	0	0	0	1	0	0	1	1	1	1	0	0	0	1	0	3	5	2	3	5	4	5	4	4	3	5	5	4	3	1	3	3	5	4	5
369	2	3	2	3	3	2	2	3	成都医学院	手术室	3	1	1	1	1	1	1	1	1	1	1	1	1	1	1	1	1	1	1	3	5	5	5	5	5	5	5	5	5	5	5	5	5	5	5	5	5	5	5
370	2	8	2	3	3	3	2	1	成都医学	感染科	3	1	1	1	1	1	1	1	1	1	1	1	1	1	1	1	1	1	1	3	4	4	4	4	4	5	4	4	4	4	5	5	5	5	5	5	5	5	5
371	2	8	2	2	5	3	2	3	成都医学院	急诊科	3	1	1	1	1	1	1	1	1	1	1	1	1	1	1	1	1	1	0	3	5	5	5	5	5	5	5	5	5	5	5	5	2	2	5	2	2	3	4
372	1	1	2	3	4	3	2	3	川北医学院	针灸科二病区	2	1	1	0	0	0	0	1	1	0	0	0	0	1	0	1	0	1	0	3	4	4	4	4	4	4	5	3	5	5	5	3	5	5	5	5	5	4	5
373	2	2	2	3	3	2	1	3	川北医学院	重症医学科	1	1	0	0	0	0	0	1	0	0	0	0	0	0	0	1	0	0	0	3	4	4	4	4	4	4	4	3	4	4	4	2	4	4	4	4	4	4	4
374	1	1	2	2	4	3	2	3	雅安职业技术学院	针二	3	1	1	1	1	0	0	1	1	1	0	1	0	1	1	1	0	1	0	3	3	2	2	5	3	4	3	2	4	3	5	2	5	5	5	5	3	3	5
375	1	1	2	2	5	3	2	2	山东协和学院	针灸科二病区	3	1	1	1	1	1	0	1	1	1	1	1	1	1	1	1	1	1	0	3	3	3	3	3	3	3	3	3	3	3	3	3	5	5	3	3	5	3	5
376	1	1	2	2	1	1	2	3	成都中医药大学	骨科三病区	3	1	0	1	1	0	0	1	1	0	0	1	1	1	1	1	1	1	0	3	4	3	4	4	3	4	4	3	4	4	4	2	5	4	5	5	3	3	5
377	1	1	2	1	5	3	1	2	四川省广播电视大学	针一	3	1	1	1	1	1	1	1	1	0	0	1	0	1	0	1	0	1	0	3	4	4	5	4	5	4	4	4	4	5	5	4	5	5	5	5	5	4	5
378	1	1	2	3	3	2	2	3	成都医学院	骨科一病区	3	1	1	1	1	0	0	1	1	0	0	1	1	1	1	1	0	1	0	3	4	3	4	5	4	5	3	2	5	5	5	3	5	5	5	5	5	3	5
379	2	8	2	4	2	2	2	3	川北医学院	肿瘤血液科	1	0	0	0	0	0	0	1	0	0	0	0	0	0	0	0	0	0	0	3	4	4	4	4	4	4	4	4	4	4	4	4	4	4	4	4	4	4	4
380	1	1	2	2	3	3	2	3	成都医学院	儿科	3	1	1	1	1	1	1	1	1	1	1	1	1	1	1	1	1	1	0	3	5	5	5	5	5	5	5	5	5	5	5	5	5	5	5	5	5	5	5
381	1	1	2	3	3	3	2	3	川北医学院	老年医学科三病区	3	1	1	0	0	1	0	1	1	0	0	1	1	0	0	0	0	1	0	3	4	4	4	4	4	4	4	4	4	4	4	4	5	5	5	5	5	5	5
382	1	1	2	4	5	2	1	3	成都中医药大学	血液净化中心	3	1	1	1	1	0	0	1	1	0	0	0	1	0	1	1	0	1	0	3	3	2	3	4	4	4	3	3	4	3	4	3	4	4	4	4	4	2	5
383	1	1	2	2	5	3	2	3	成都医学院	急诊科	2	0	1	0	0	0	0	0	1	0	0	0	1	0	0	0	0	0	0	3	4	4	4	4	4	4	4	4	4	4	4	4	5	5	5	5	5	5	5
384	2	20	2	3	3	3	2	3	广播电视大学	妇科	3	1	1	1	1	1	1	1	1	1	1	1	1	1	1	1	1	1	0	3	5	5	5	5	5	5	5	5	5	5	5	5	5	5	5	5	5	5	5
385	1	1	2	3	3	2	2	3	川北医学院	呼吸科	3	1	1	1	1	1	1	1	1	0	1	0	1	0	1	0	0	1	0	3	3	3	3	3	3	4	3	3	4	5	5	3	5	5	4	4	5	4	5
386	1	1	2	2	5	3	2	3	西南财经大学天府学院	重症医学科	3	0	1	0	0	1	0	1	1	0	0	0	0	0	0	0	0	1	0	3	5	5	5	5	5	5	5	5	5	5	5	5	2	4	3	2	4	1	2
387	1	1	1	2	5	3	2	3	西南财经大学天府学院	针灸科	3	1	1	0	0	0	0	1	1	0	0	0	0	1	1	0	0	1	0	3	4	4	4	4	4	5	4	4	3	4	4	3	5	5	3	3	3	3	4
388	2	6	2	3	3	3	2	3	川北医学院	消化内科	2	0	0	0	0	1	0	0	0	1	0	1	0	0	0	0	0	0	0	3	4	3	3	4	4	5	3	4	4	4	4	4	4	3	4	3	3	3	5
389	2	3	2	3	3	2	2	3	成都医学院	手术室	1	1	1	1	1	1	1	1	1	1	1	1	1	1	1	1	1	1	0	3	4	4	4	4	4	4	4	4	4	4	4	4	4	4	4	4	4	4	4
390	2	14	2	3	2	3	2	3	中国医科大学	康复科	3	1	1	1	1	1	1	1	1	1	1	1	1	1	1	1	1	1	0	3	4	4	4	4	4	4	4	4	4	4	4	4	5	4	4	5	4	5	4
391	1	1	2	2	5	3	2	3	成都医学院	急诊科	2	1	1	1	1	0	0	0	1	0	0	0	0	0	1	0	0	1	0	3	4	4	4	4	4	4	4	4	4	4	5	4	5	5	5	5	2	1	3
392	1	1	2	3	2	3	2	3	成都医学院	消毒供应中心	1	1	1	1	1	1	1	1	1	1	1	1	1	1	1	1	1	1	0	3	5	5	5	5	5	5	5	5	5	5	5	5	5	5	5	5	5	1	2
393	1	1	2	4	5	3	1	3	成都中医药大学	肛肠科	3	1	1	1	1	1	0	1	1	1	0	1	1	0	1	1	0	1	0	3	4	4	4	4	4	4	4	4	4	4	5	3	5	5	5	5	1	5	4
394	1	1	2	1	5	3	1	3	成都中医药大学	消毒供应中心	2	1	0	0	0	0	0	0	1	0	1	0	0	0	0	0	0	1	0	3	5	5	5	4	4	4	4	3	3	5	5	3	4	3	4	4	4	4	2
395	1	1	2	2	2	1	2	3	成都中医药大学	手术室	3	1	1	1	1	1	0	1	1	0	0	0	0	0	0	0	0	0	0	3	4	4	4	4	4	4	4	4	4	4	4	4	4	4	4	4	4	4	5
396	1	15	2	3	3	2	1	3	成都中医药大学	内科	3	1	1	1	1	1	1	0	1	1	0	1	1	1	1	1	0	1	0	3	5	5	5	5	5	5	5	5	5	5	5	5	5	5	5	5	2	4	1
397	1	15	2	2	5	1	2	3	成都华大医药卫生学校	内科	1	1	0	0	0	0	0	0	0	0	0	1	0	0	0	0	0	0	0	3	5	5	5	5	5	5	5	5	5	5	5	5	5	5	5	5	5	5	5
398	1	15	2	3	3	2	2	3	四川中医药高等专科学校	内科	3	1	0	0	0	1	0	1	1	0	0	0	1	0	0	0	0	0	0	3	4	4	4	4	4	4	4	3	4	4	4	2	5	4	5	5	5	4	5
399	1	1	2	3	3	2	2	3	成都中医药大学	护理部	3	1	1	1	1	1	0	1	1	1	1	1	1	1	1	1	1	1	0	3	4	4	4	4	4	4	4	4	4	4	4	4	5	5	5	5	5	4	5
400	1	17	2	2	2	1	2	3	四川护理职业学院	妇产科	3	1	0	1	1	1	0	1	1	0	0	0	1	1	1	0	0	0	0	3	4	4	4	4	4	4	4	3	5	3	4	3	5	2	5	5	5	3	5
401	1	1	2	4	4	3	1	3	成都中医药大学	重症医学科	3	0	1	0	0	1	0	1	1	0	0	0	1	0	0	1	0	1	0	3	5	5	5	5	5	5	5	5	5	5	5	5	5	5	5	5	5	5	5
402	1	1	2	4	4	2	1	3	成都中医药大学	照护区	1	1	0	0	0	0	0	1	1	0	1	1	1	0	1	1	0	1	0	3	3	3	3	3	4	5	5	4	4	3	5	3	5	4	4	4	5	5	5
403	1	17	2	2	5	1	2	3	西南财经大学天府学院	针灸康复科	3	1	1	1	1	1	0	1	1	1	1	1	1	0	1	1	0	1	0	3	4	4	4	4	4	4	4	4	4	4	4	4	5	5	5	5	5	4	5
404	1	9	2	2	5	3	2	3	川北医学院	急诊	2	0	1	0	0	1	0	0	0	0	0	0	0	0	0	0	0	1	0	3	3	3	3	4	3	3	2	3	2	3	5	2	5	5	5	5	5	4	5
405	1	15	2	3	3	2	2	3	成都铁路卫校	针灸科	3	1	0	1	1	1	0	1	1	1	1	1	1	0	1	1	1	1	0	3	3	3	3	3	3	3	3	3	3	3	3	3	5	3	5	5	5	2	5
406	1	7	2	2	1	3	2	3	四川护理职业学院	急诊科	3	1	1	0	0	1	0	1	1	0	1	1	0	0	1	1	0	1	0	3	4	4	4	4	4	4	4	4	4	4	4	4	5	5	4	4	5	4	5
407	1	15	2	2	2	3	2	3	广元	针灸康复科	2	1	0	0	0	0	0	1	0	1	0	1	0	0	1	0	1	1	0	3	3	3	3	3	3	4	4	3	4	4	4	3	5	5	5	5	5	3	5
408	1	9	2	2	1	3	2	3	广元市利州中等专业学校	内一科	2	1	1	0	0	1	0	1	1	0	0	0	0	0	0	0	0	0	0	3	4	4	4	4	4	4	4	4	4	4	4	4	4	4	4	4	4	4	4
409	1	1	2	4	4	3	1	3	成都中医药大学	肿瘤科	3	1	1	1	1	1	0	1	1	0	1	1	1	1	1	1	0	1	1	3	3	3	3	3	3	3	3	3	3	3	3	3	5	5	5	5	5	3	5
410	1	1	2	2	1	3	2	3	成都医学院	危重症医学科	3	0	1	0	0	1	0	1	1	0	0	0	1	1	1	1	0	1	0	3	5	4	5	4	3	4	4	4	5	4	4	3	5	5	4	4	5	4	5
411	1	1	2	3	3	3	2	3	成都中医药大学	老年医学科三病区	2	1	1	0	0	1	0	1	1	0	1	1	1	0	1	1	0	1	0	3	5	5	5	5	5	5	5	5	5	5	5	5	5	5	5	5	5	5	5
412	1	1	2	2	3	2	2	3	职工医学院	老年科	3	1	0	0	0	0	0	1	1	0	0	1	1	0	1	1	1	1	0	3	3	3	3	3	3	3	3	3	5	5	5	3	5	5	5	5	5	5	5
413	1	1	2	4	4	2	1	3	成都中医药大学	照护区	1	1	0	0	0	0	0	1	1	0	1	1	1	0	1	1	0	1	0	3	3	3	3	3	3	3	2	2	4	4	5	3	5	4	4	4	5	4	5
414	1	1	2	3	3	1	2	3	山东烟台中医药学院	肾病血液感染科	3	1	1	1	1	1	0	1	1	0	1	0	1	0	0	1	0	1	0	3	3	2	4	4	3	5	4	3	5	4	5	3	5	5	5	5	5	3	5
415	1	1	2	3	3	2	1	3	成都中医药大学	妇产科	3	1	1	1	1	1	1	1	1	1	1	1	1	1	1	1	1	1	0	3	3	3	3	3	2	4	3	1	2	4	5	2	5	5	5	5	5	5	5
416	1	1	2	2	2	2	2	3	成都中医药大学	急诊科	3	1	1	1	1	1	1	1	1	1	1	1	1	1	1	1	1	1	0	3	4	4	4	4	2	3	3	1	3	5	5	3	5	5	5	5	5	5	5
417	1	1	1	2	5	1	2	2	四川护理职业学院	重症医学科	3	1	1	1	1	1	1	1	1	0	1	1	1	1	1	1	1	1	1	3	4	4	4	4	4	4	4	4	4	4	4	4	4	4	4	4	4	4	4
418	1	1	2	3	3	1	2	2	乐山职业技术学院	重症医学科	2	1	1	1	1	1	0	1	1	0	0	1	1	0	1	1	0	1	0	3	4	3	3	4	4	4	4	3	4	4	4	4	5	5	5	5	5	3	5
419	1	1	2	3	2	1	2	2	西南医科大	急诊科	3	1	1	1	1	1	1	1	1	1	1	1	1	1	1	1	1	1	0	3	4	4	4	4	3	4	3	3	5	5	5	3	5	5	5	5	5	5	5
420	1	1	1	2	5	1	2	3	西南财经大学天府学院	普外科	3	1	1	0	1	0	1	1	1	1	1	0	0	0	0	0	0	0	0	3	3	4	4	3	4	3	3	4	3	3	3	3	5	4	4	5	5	5	5
421	1	1	2	2	5	1	2	2	四川中医院高等专科学校	普外科	3	1	1	1	1	1	0	1	1	0	1	1	1	1	1	1	0	1	0	3	3	3	3	4	3	4	3	4	4	5	5	4	5	5	3	5	5	3	5
422	1	1	2	1	5	3	1	3	四川泸州医学院	老年科	3	1	1	1	1	1	0	1	1	0	1	1	1	0	1	1	0	1	0	3	4	3	3	3	3	4	4	3	4	4	4	2	5	5	5	5	5	3	5
423	1	9	2	3	1	1	2	3	川北医学院	外二科	2	1	0	0	0	0	0	1	1	0	0	0	1	0	0	0	0	0	0	3	4	4	4	4	4	4	4	4	4	4	4	4	4	4	4	4	4	4	4
424	1	1	2	2	1	1	2	3	国家开放大学	妇产科	1	1	1	1	1	1	0	1	1	0	0	0	0	0	0	0	0	0	0	3	4	4	4	4	4	4	4	4	4	4	4	4	4	4	4	4	4	4	4
425	1	9	2	2	2	2	2	3	四川省达州职业技术学院	重症医学科	3	1	1	1	1	1	1	1	1	1	1	1	1	1	1	1	1	1	1	3	4	4	4	4	4	4	4	4	4	5	5	4	4	4	4	4	4	4	5
426	1	1	2	1	5	2	1	2	成都中医药大学	骨二科	2	0	0	0	0	0	0	0	1	0	0	0	1	0	0	0	0	1	0	3	5	4	4	4	4	5	5	2	5	5	5	3	5	5	5	5	5	4	5
427	1	1	2	3	2	2	2	3	成都中医药大学	眼耳鼻咽喉科	3	1	1	0	0	0	0	1	1	0	0	1	0	0	1	0	1	1	0	3	4	4	4	4	4	4	4	4	5	5	5	4	5	5	5	5	5	5	5
428	1	1	2	3	3	1	2	3	金华职业技术	体检中心	1	1	1	0	0	0	0	0	1	0	0	0	0	0	0	0	0	0	0	3	5	5	5	5	5	5	5	5	5	5	5	5	5	5	5	5	5	5	5
429	1	9	2	3	3	2	2	3	成都中医药大学	外一	3	1	0	1	1	1	1	0	1	0	1	1	1	1	1	1	0	0	0	3	4	4	4	4	4	4	4	4	4	4	4	4	4	4	4	4	4	4	4
430	1	1	2	3	3	1	2	3	成都中医药大学	脑、胸、泌尿外科	3	1	1	0	0	0	0	1	1	0	0	0	1	0	0	0	0	1	0	3	4	4	3	3	3	3	3	3	5	4	4	2	5	5	5	5	5	5	5
431	1	9	2	3	3	2	2	3	中国电大	骨科	3	1	1	1	1	1	1	1	1	1	1	1	1	0	1	1	1	1	0	3	5	5	5	5	5	5	5	5	5	5	5	5	5	5	5	5	5	5	5
432	1	9	2	2	1	1	2	3	北京中医药大学	骨科	2	1	0	0	0	0	0	1	1	0	0	0	1	0	0	0	0	1	0	3	4	4	4	4	4	4	4	4	4	4	4	4	5	5	4	4	4	4	5
433	1	9	2	2	2	1	2	3	川北医院院	针灸康复科	2	1	0	1	1	1	0	1	1	1	1	1	1	0	1	1	0	1	1	3	3	3	3	3	3	3	3	3	3	3	3	3	5	3	5	5	3	3	5
434	1	9	2	2	1	1	2	3	四川天一学院	针灸科	3	1	0	0	1	1	0	1	1	1	0	1	1	0	1	1	0	1	1	3	4	4	4	4	4	4	4	4	4	4	4	4	5	3	5	5	5	4	5
435	1	15	2	2	2	1	2	3	成都医学院	手术室	2	1	0	1	1	1	0	1	1	0	1	1	1	1	1	1	0	1	0	3	4	4	4	4	4	4	4	4	4	4	4	4	5	4	5	5	5	5	5
436	1	7	2	2	2	1	2	3	成都医学院	急诊科	3	1	1	1	1	1	1	1	1	1	1	1	1	1	1	1	1	1	0	3	4	4	4	4	4	4	4	4	4	4	4	4	4	4	4	4	4	4	4
437	1	7	2	3	2	2	2	3	雅安职业技术学院	急诊科	2	1	1	1	1	0	0	1	1	0	1	0	0	0	0	0	0	1	0	3	3	3	3	4	3	4	4	3	4	4	4	4	5	5	5	5	3	5	5
438	1	7	2	1	5	2	1	3	川北医学院	供应室	3	1	1	1	1	1	0	1	0	0	1	0	0	1	0	1	0	0	0	3	4	4	4	4	4	4	4	3	3	4	4	2	4	4	4	4	4	4	5
439	1	7	2	4	5	2	1	2	川北医学院	治未病科	3	1	1	1	1	0	0	1	1	0	1	1	0	0	0	0	0	0	0	3	3	3	3	3	3	4	3	3	4	4	4	2	5	5	5	5	3	3	5
440	1	7	2	3	3	2	2	3	南充卫校	治未病科	2	1	1	1	1	0	0	1	1	1	1	1	0	0	0	0	0	0	0	3	3	3	4	4	4	4	4	3	4	4	4	3	4	4	4	4	3	3	4
441	1	17	2	2	1	1	2	3	乐山职业技术学院	外二	3	1	1	1	0	0	0	1	1	0	0	1	1	0	0	0	0	0	0	3	5	5	5	5	5	5	5	5	5	5	5	5	5	5	1	4	3	3	4
442	1	17	2	2	2	2	2	3	成都医学院	外一	3	1	0	1	1	1	1	1	1	0	1	1	1	0	1	1	0	1	0	3	5	5	5	5	5	5	5	5	5	5	5	5	5	4	3	1	3	3	5
443	1	17	2	2	2	2	2	3	四川大学	手术室	2	1	0	1	1	1	1	1	1	0	0	0	0	0	1	1	0	1	0	3	4	4	4	4	4	4	4	4	4	4	4	4	5	5	2	4	1	2	1
444	1	17	2	2	1	1	2	3	西南财经大学天府学院	针灸康复科	3	1	1	1	1	1	1	1	1	1	1	1	1	1	1	1	1	1	0	3	4	4	4	4	4	4	4	4	4	4	4	4	4	4	4	4	4	4	4
445	1	17	2	2	1	1	2	3	陕西能源职业技术学院	针灸康复科	3	1	0	1	1	1	0	1	1	1	0	1	1	0	0	1	1	0	0	3	4	4	4	4	4	4	4	4	4	4	4	4	4	4	4	4	4	3	4
446	1	17	2	4	5	3	1	3	四川开放大学	骨科	3	1	0	0	0	0	0	1	1	0	0	0	1	0	0	0	0	1	0	3	4	4	3	3	3	4	3	3	3	4	4	3	5	3	4	4	4	4	5
447	1	17	2	2	1	1	2	3	延安大学西安创新学院	供应室	3	1	1	1	1	1	0	1	1	1	1	1	1	1	1	1	1	1	0	3	5	5	5	5	5	3	5	3	5	5	5	2	5	5	5	5	5	5	5
448	1	17	2	2	3	2	2	3	成都医学院	重症医学科	3	1	1	1	1	1	1	1	1	1	1	1	1	0	1	1	0	1	0	3	5	5	5	5	5	5	5	5	5	5	5	5	5	5	5	5	5	5	5
449	1	17	2	2	2	1	2	3	四川大学附设华西卫校	针灸康复科	3	1	0	1	1	0	0	1	1	1	0	1	1	0	0	0	0	0	0	3	4	4	4	4	4	4	4	4	4	4	4	4	5	4	5	5	5	4	5
450	1	17	2	3	2	2	2	3	四川省绵阳市中医药高等专科学校	手术室	3	1	0	1	1	1	0	1	1	0	0	1	1	0	1	1	0	1	0	3	5	5	5	5	5	5	5	5	5	5	5	5	5	5	5	5	5	5	5
451	1	17	2	2	2	1	2	3	川北医学院	骨二科	2	1	0	0	0	0	0	1	1	0	0	0	0	0	0	1	0	0	0	3	4	4	4	4	4	4	4	4	4	4	4	4	4	4	4	4	4	4	4
452	1	17	2	2	2	1	2	3	四川大学附设华西卫生学校	ICU	2	0	1	0	0	0	0	1	1	0	0	0	0	0	0	0	0	0	0	3	4	4	4	4	4	4	4	4	4	4	4	4	4	4	4	4	4	4	4
453	1	17	2	2	2	2	2	3	电大	外二	3	1	1	1	1	1	0	1	1	0	1	1	1	0	1	1	0	1	0	3	5	5	5	5	5	5	5	5	5	5	5	4	5	5	5	5	5	5	5
454	1	17	2	3	2	2	2	1	川北医学院	儿科二	2	0	1	0	0	0	0	1	1	0	0	0	1	0	0	0	0	0	0	3	4	4	4	4	4	4	4	3	5	3	5	3	5	3	3	3	3	3	5
455	1	17	2	2	1	1	2	1	四川国际标榜职业学院	内一科	2	0	0	0	0	0	0	0	0	0	0	1	1	0	0	0	0	0	0	3	5	5	5	5	5	5	5	5	5	5	5	5	5	5	5	5	5	5	5
456	1	17	2	2	1	1	2	2	四川中医药高等专科学校	骨科二	2	1	0	0	0	0	0	1	0	0	0	0	1	0	0	0	0	0	0	3	4	4	4	4	4	4	4	4	4	4	4	4	4	4	4	4	4	4	4
457	1	17	2	2	2	1	2	2	达州职业技术学院	呼吸内科	2	1	1	1	1	1	0	1	1	0	1	0	1	0	1	1	0	1	0	3	4	4	4	4	4	4	4	4	4	4	4	4	4	4	4	4	4	4	4
[truncated: 54 more columns]
